# Supplementary material for: Extension of the AMBER force-field for the study of large nitroxides in condensed phases: an ab initio parameterization
Source: Royal Society of Chemistry journal article supplement (doi:10.1039/c001481h), 2010-01-01
Supplement: c001481h.pdf [file c001481h.pdf]

## SUPPORTING INFORMATION.

# Extension of the AMBER Force-Field for the Study of Large Nitroxides in Condensed Phases: An *ab initio* Parameterization.

Emiliano Stendardo<sup>1</sup>, Alfonso Pedone,<sup>2</sup> Paola Cimino,<sup>3</sup> Maria Cristina Menziani,<sup>4</sup> Orlando Crescenzi<sup>1</sup> and  
Vincenzo Barone<sup>2</sup>

<sup>1</sup>*Dipartimento di Chimica "Paolo Corradini", Università di Napoli Federico II, Via Cintia, 80126 Napoli,  
ITALIA*

<sup>2</sup>*Scuola Normale Superiore, Piazza dei Cavalieri 7, 56126 Pisa, ITALIA*

<sup>3</sup>*Dipartimento di Scienze Farmaceutiche, Università di Salerno, via Ponte don Melillo, 84084 Fisciano (Sa),  
ITALIA*

<sup>4</sup>*Dipartimento di Chimica, Università di Modena e Reggio Emilia, Via G. Campi 183, 41100 Modena, ITALIA*

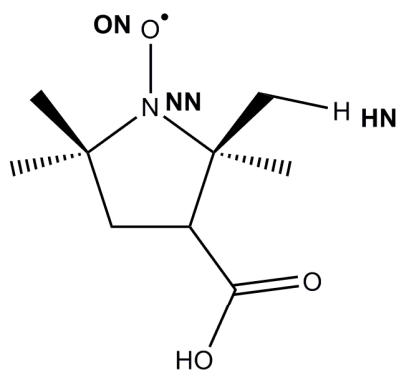

2,2,5,5-tetramethylpyrrolidine-1-oxyl-3-carboxylic acid  
(3-carboxy-PROXYL)

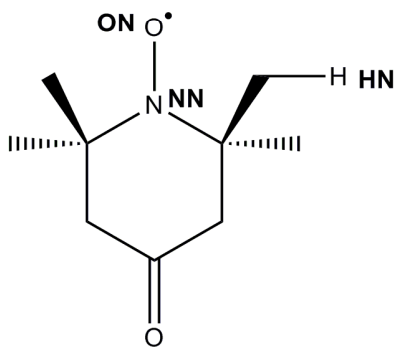

4-oxo-2,2,6,6-tetramethylpiperidine-1-oxyl  
(4-oxo-TEMPO)

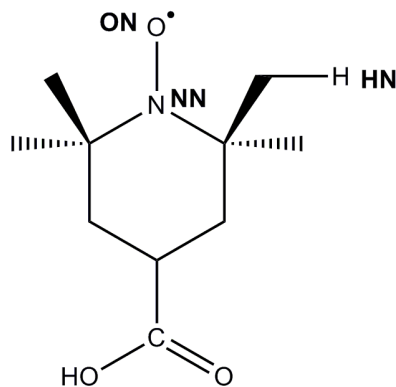

2,2,6,6-tetramethylpiperidine-1-oxyl-4-carboxylic acid  
(4-carboxy-TEMPO)

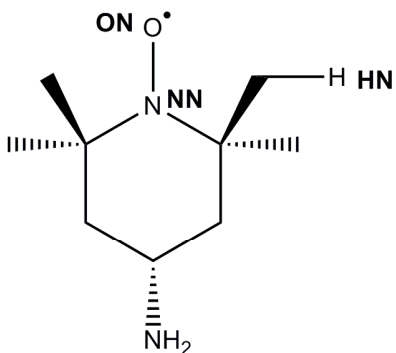

4-amino-2,2,6,6-tetramethylpiperidine-1-oxyl  
(TANINE)

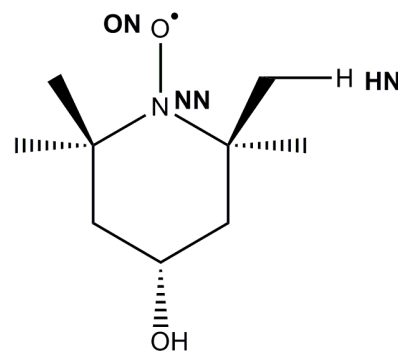

4-hydroxy-2,2,6,6-tetramethylpiperidine-1-oxyl  
(TANOL)

**Figure S.1.** Structures and atom types of other nitroxides considered in the present work

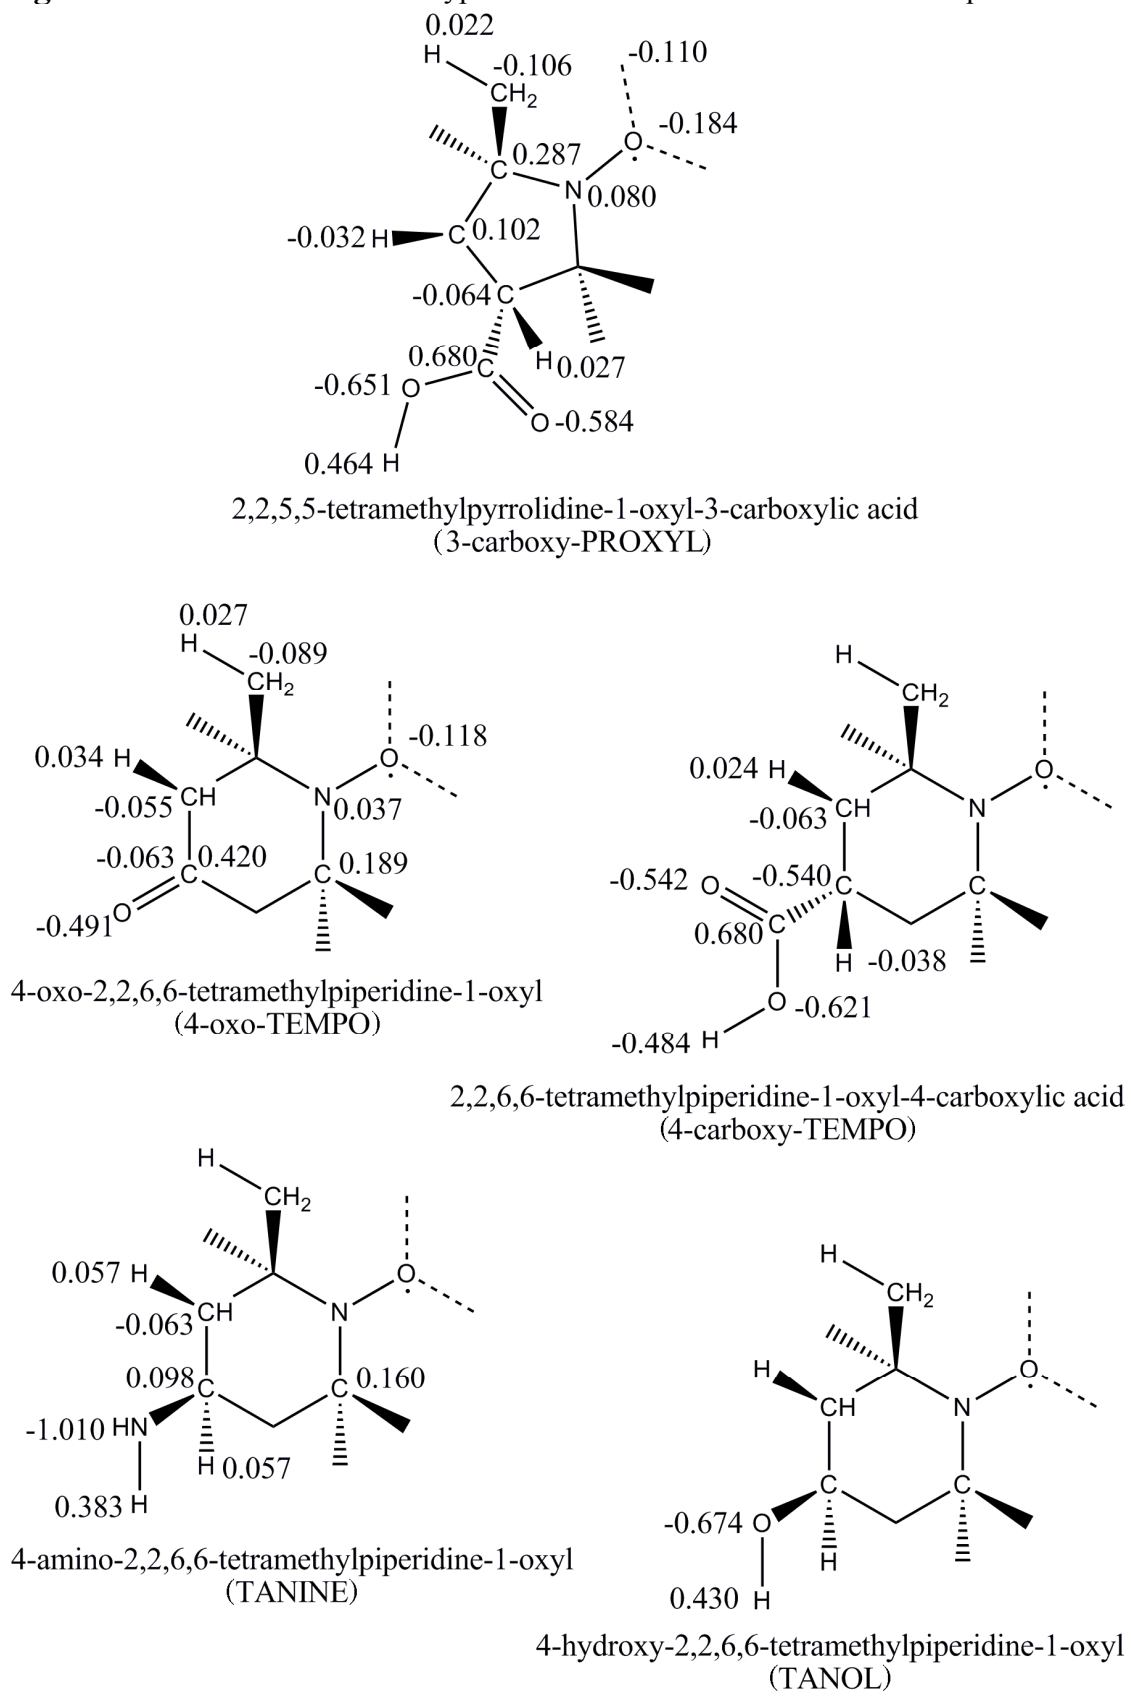

**Figure S.2.** RESP charges of other nitroxides considered in the present work.

**Table S.1.** Structural features and nitrogen hyperfine coupling constants of 3-Oxo-PROXYL and NITNO.

|                                                  | <b>3-oxo-PROXYL</b> |           | <b>NITNO</b> |           |
|--------------------------------------------------|---------------------|-----------|--------------|-----------|
|                                                  | <b>QM</b>           | <b>MM</b> | <b>QM</b>    | <b>MM</b> |
| <b>Bond lengths (Å)</b>                          |                     |           |              |           |
| N-O                                              | 1.260               | 1.260     | 1.259        | 1.256     |
| N-C <sub>2</sub>                                 | 1.486               | 1.483     | 1.345        | 1.345     |
| <b>Bond Angles (deg.)</b>                        |                     |           |              |           |
| C <sub>2</sub> -N-C <sub>4</sub>                 | 115.6               | 115.7     | 110.5        | 110.9     |
| O-N-C <sub>2</sub>                               | 121.5               | 121.0     | 121.5        | 121.0     |
| <b>Regular torsions (deg.)</b>                   |                     |           |              |           |
| O-N-C <sub>2</sub> -C <sub>3</sub>               | 174.1               | 171.2     | 180.0        | 179.0     |
| C <sub>5</sub> -N-C <sub>2</sub> -C <sub>3</sub> | 8.3                 | 8.1       | -            | -         |
| <b>Improper torsions (deg.)</b>                  |                     |           |              |           |
| C <sub>2</sub> -C <sub>4</sub> -N-O              | 165.8               | 163.1     | 180.0        | 179.6     |
| <b>A<sub>N</sub> (G)</b>                         | 13.0                | 13.0      | 6.8          | 6.9       |

## frcmod.NITROXIDES.dat

Nitroxides parameters update of ff99SB (2009)

### MASS

|    |       |
|----|-------|
| ON | 16.00 |
| NN | 14.01 |
| HN | 1.008 |
| CI | 12.01 |
| CE | 12.01 |
| CF | 12.01 |
| CX | 12.01 |
| CP | 12.01 |
| LP | 9.00  |

### BOND

|       |        |       |
|-------|--------|-------|
| ON-NN | 360.00 | 1.258 |
| CT-NN | 370.00 | 1.477 |
| CI-NN | 370.00 | 1.485 |
| CX-NN | 370.00 | 1.340 |
| CP-NN | 370.00 | 1.477 |
| CF-NN | 428.00 | 1.390 |
| CT-HN | 340.00 | 1.090 |
| C -CI | 317.00 | 1.550 |
| C -CP | 317.00 | 1.522 |
| CI-CA | 317.00 | 1.510 |
| CX-CT | 317.00 | 1.455 |
| CI-CT | 310.00 | 1.526 |
| CP-CT | 310.00 | 1.526 |
| C -CE | 447.00 | 1.460 |
| CF-CE | 447.00 | 1.400 |
| CF-CA | 469.00 | 1.400 |
| CE-CA | 469.00 | 1.404 |
| LP-ON | 325.00 | 0.450 |

### ANGLE

|          |       |        |
|----------|-------|--------|
| ON-NN-CT | 82.00 | 117.50 |
| ON-NN-CP | 82.00 | 117.50 |
| ON-NN-CF | 82.00 | 121.50 |
| ON-NN-CI | 82.00 | 118.50 |
| ON-NN-CX | 82.00 | 120.00 |
| CI-C -O  | 80.00 | 120.40 |
| CP-C -O  | 80.00 | 120.40 |
| CE-C -O  | 80.00 | 128.80 |
| NN-CF-CA | 70.00 | 132.80 |
| C -CT-NN | 70.00 | 108.70 |
| CE-CF-NN | 70.00 | 111.40 |
| C -CI-NN | 70.00 | 107.00 |
| C -CP-NN | 70.00 | 108.70 |
| CA-CA-CI | 70.00 | 120.00 |
| C -CE-CA | 63.00 | 134.90 |
| NN-CT-CA | 63.00 | 114.00 |
| C -CI-CA | 63.00 | 109.40 |
| CT-CI-CA | 63.00 | 112.00 |
| CT-CI-C  | 63.00 | 111.10 |
| CE-C -CT | 63.00 | 106.40 |
| CE-C -CI | 63.00 | 106.40 |
| C -CE-CF | 63.00 | 108.00 |
| NN-CI-CA | 63.00 | 109.00 |
| CF-CE-CA | 63.00 | 116.20 |

|          |       |        |
|----------|-------|--------|
| CF-CA-CA | 63.00 | 120.00 |
| CE-CA-CA | 63.00 | 120.00 |
| CE-CF-CA | 63.00 | 122.70 |
| CT-CP-C  | 63.00 | 111.10 |
| CP-C -CT | 63.00 | 106.40 |
| NN-CT-H1 | 61.12 | 106.30 |
| CT-CT-NN | 60.00 | 107.50 |
| CT-CI-NN | 60.00 | 107.50 |
| CT-CP-NN | 60.00 | 107.50 |
| CT-NN-CT | 52.60 | 120.80 |
| CF-NN-CT | 52.60 | 120.80 |
| CP-NN-CT | 52.60 | 120.80 |
| CF-NN-CI | 52.60 | 110.00 |
| HN-CT-CT | 50.00 | 109.50 |
| HN-CT-CP | 50.00 | 109.50 |
| HC-CT-CI | 50.00 | 109.50 |
| CT-NN-CX | 50.00 | 109.50 |
| NN-CX-NN | 50.00 | 109.00 |
| NN-CX-CT | 50.00 | 109.50 |
| NT-CT-HP | 50.00 | 109.50 |
| CX-CT-HC | 50.00 | 109.50 |
| CE-CA-HA | 50.00 | 120.00 |
| CF-CA-HA | 50.00 | 120.00 |
| HN-CT-HN | 35.00 | 109.50 |
| CT-CP-CT | 40.00 | 109.50 |
| LP-ON-NN | 600.0 | 120.00 |
| LP-ON-LP | 600.0 | 120.00 |

DIHEDRAL

|             |   |       |       |   |
|-------------|---|-------|-------|---|
| X -CX-NN-X  | 4 | 14.50 | 180.0 | 2 |
| X -CF-NN-X  | 4 | 6.00  | 180.0 | 2 |
| X -CI-CT-X  | 9 | 1.40  | 0.0   | 3 |
| X -CP-CT-X  | 9 | 1.40  | 0.0   | 3 |
| X -CI-CA-X  | 6 | 0.00  | 0.0   | 2 |
| X -C -CI-X  | 6 | 0.00  | 0.0   | 2 |
| X -C -CP-X  | 6 | 0.00  | 0.0   | 2 |
| X -NN-CI-X  | 6 | 0.00  | 0.0   | 3 |
| X -NN-CP-X  | 6 | 0.204 | 0.0   | 3 |
| X -NN-CT-X  | 6 | 0.204 | 0.0   | 3 |
| X -CA-CE-X  | 4 | 14.00 | 180.0 | 2 |
| X -C -CE-X  | 4 | 12.00 | 180.0 | 2 |
| X -CA-CF-X  | 4 | 14.50 | 180.0 | 2 |
| X -CE-CF-X  | 4 | 12.00 | 180.0 | 2 |
| X -NN-ON-LP | 2 | 0.000 | 180.0 | 2 |
| ON-NN-CT-CT | 1 | 0.260 | 0.0   | 3 |
| ON-NN-CP-C  | 1 | 0.260 | 0.0   | 3 |
| ON-NN-CP-CT | 1 | 0.260 | 0.0   | 3 |
| ON-NN-CT-H1 | 1 | 0.260 | 0.0   | 3 |
| CT-NN-CT-H1 | 1 | 0.000 | 0.0   | 3 |
| CT-NN-CT-CX | 1 | 0.000 | 0.0   | 3 |
| CT-NN-CP-C  | 1 | 0.000 | 0.0   | 3 |
| CX-NN-CT-H1 | 1 | 0.100 | 0.0   | 3 |
| NN-CT-CT-HN | 1 | 0.100 | 0.0   | 3 |
| NN-CT-CT-HC | 1 | 0.100 | 0.0   | 3 |
| NN-CX-CT-HC | 1 | 0.100 | 0.0   | 3 |
| NN-CI-CT-HC | 1 | 0.100 | 0.0   | 3 |
| NN-CT-CT-CT | 1 | 0.143 | 0.0   | 3 |
| NN-CP -C-CT | 1 | 0.000 | 0.0   | 2 |
| HN-CT-CT-CT | 1 | 0.160 | 0.0   | 3 |
| CF-NN-CI-C  | 1 | 1.500 | 180.0 | 2 |
| CE-C -CI-NN | 1 | 1.500 | 180.0 | 2 |
| C -CI-NN-ON | 1 | 1.500 | 180.0 | 2 |
| O -C -CI-NN | 1 | 1.500 | 180.0 | 2 |

IMPROPER TORSIONS

|             |       |      |    |
|-------------|-------|------|----|
| X -CT-NN-CX | 1.10  | 180. | 2. |
| CE-CI-C-O   | 1.10  | 180  | 2. |
| CA-CA-CA-CI | 1.10  | 180. | 2. |
| CF-CA-CE-C  | 1.10  | 180. | 2. |
| CA-CE-CF-NN | 1.10  | 180. | 2. |
| LP-LP-ON-NN | 10.10 | 180. | 2. |
| NN-NN-CX-CT | 10.10 | 180. | 2. |

NONBON

|    |        |        |
|----|--------|--------|
| HN | 1.43   | 0.0157 |
| NN | 1.90   | 0.2627 |
| ON | 1.6750 | 0.2445 |
| CF | 1.9080 | 0.0860 |
| CE | 1.9080 | 0.0860 |
| CI | 1.9080 | 0.0860 |
| CX | 1.9080 | 0.0860 |
| CP | 1.9080 | 0.1094 |
| LP | 0.00   | 0.0000 |

## NITROXIDES09.lib

```
!!index array str
"CPH"
"CPR"
"CTH"
"CTM"
"DMN"
"DTB"
"IND"
"NIT"
"OPR"
"OTM"
"PRX"
"TMP"
"TNN"
"TNO"
!entry.CPH.unit.atoms table str name str type int typex int resx int flags int seq
int elmnt dbl chg
"C1" "CT" 0 1 131074 1 6 0.287000
"N2" "NN" 0 1 131074 2 7 0.080000
"C3" "CT" 0 1 131074 3 6 0.287000
"C4" "CT" 0 1 131074 4 6 0.102000
"C5" "CT" 0 1 131074 5 6 -0.064300
"O6" "ON" 0 1 131074 6 8 -0.184000
"C7" "CT" 0 1 131074 7 6 -0.106000
"C8" "CT" 0 1 131074 8 6 -0.106000
"C9" "CT" 0 1 131074 9 6 -0.106000
"C10" "CT" 0 1 131074 10 6 -0.106000
"H11" "HN" 0 1 131074 11 1 0.022000
"H12" "HN" 0 1 131074 12 1 0.022000
"H13" "HN" 0 1 131074 13 1 0.022000
"H14" "HN" 0 1 131074 14 1 0.022000
"H15" "HN" 0 1 131074 15 1 0.022000
"H16" "HN" 0 1 131074 16 1 0.022000
"H17" "HN" 0 1 131074 17 1 0.022000
"H18" "HN" 0 1 131074 18 1 0.022000
"H19" "HN" 0 1 131074 19 1 0.022000
"H20" "HN" 0 1 131074 20 1 0.022000
"H21" "HN" 0 1 131074 21 1 0.022000
"H22" "HN" 0 1 131074 22 1 0.022000
"H23" "HC" 0 1 131074 23 1 -0.032000
"H24" "HC" 0 1 131074 24 1 -0.032000
"H25" "HC" 0 1 131074 25 1 0.027000
"C26" "C" 0 1 131074 26 6 0.680100
"O27" "O" 0 1 131074 27 8 -0.583800
"O28" "OH" 0 1 131074 28 8 -0.651100
"H29" "HO" 0 1 131074 29 1 0.464100
"Lp1" "LP" 0 1 131074 30 0 -0.110000
"Lp2" "LP" 0 1 131074 31 0 -0.110000
!entry.CPH.unit.atoms pertinfo table str pname str ptype int ptypex int pelmnt dbl
pchg
"C1" "CT" 0 -1 0.0
"N2" "NN" 0 -1 0.0
"C3" "CT" 0 -1 0.0
"C4" "CT" 0 -1 0.0
"C5" "CT" 0 -1 0.0
"O6" "ON" 0 -1 0.0
"C7" "CT" 0 -1 0.0
"C8" "CT" 0 -1 0.0
```



```
"C9" "CT" 0 -1 0.0
"C10" "CT" 0 -1 0.0
"H11" "HN" 0 -1 0.0
"H12" "HN" 0 -1 0.0
"H13" "HN" 0 -1 0.0
"H14" "HN" 0 -1 0.0
"H15" "HN" 0 -1 0.0
"H16" "HN" 0 -1 0.0
"H17" "HN" 0 -1 0.0
"H18" "HN" 0 -1 0.0
"H19" "HN" 0 -1 0.0
"H20" "HN" 0 -1 0.0
"H21" "HN" 0 -1 0.0
"H22" "HN" 0 -1 0.0
"H23" "HC" 0 -1 0.0
"H24" "HC" 0 -1 0.0
"H25" "HC" 0 -1 0.0
"C26" "C" 0 -1 0.0
"O27" "O" 0 -1 0.0
"O28" "OH" 0 -1 0.0
"H29" "HO" 0 -1 0.0
"Lp1" "LP" 0 -1 0.0
"Lp2" "LP" 0 -1 0.0
!entry.CPH.unit.boundbox array dbl
-1.000000
0.0
0.0
0.0
0.0
!entry.CPH.unit.childsequence single int
2
!entry.CPH.unit.connect array int
0
0
!entry.CPH.unit.connectivity table int atom1x int atom2x int flags
1 9 1
1 10 1
1 5 1
1 2 1
2 3 1
2 6 1
3 4 1
3 7 1
3 8 1
4 5 1
4 24 1
4 23 1
5 26 1
5 25 1
6 31 1
6 30 1
7 12 1
7 11 1
7 13 1
8 16 1
8 14 1
8 15 1
9 17 1
9 18 1
9 19 1
10 20 1
10 21 1
10 22 1
```

```
26 28 1
26 27 1
28 29 1
!entry.CPH.unit.hierarchy table  str abovetype  int abovex  str belowtype  int belowx
"U" 0 "R" 1
"R" 1 "A" 1
"R" 1 "A" 2
"R" 1 "A" 3
"R" 1 "A" 4
"R" 1 "A" 5
"R" 1 "A" 6
"R" 1 "A" 7
"R" 1 "A" 8
"R" 1 "A" 9
"R" 1 "A" 10
"R" 1 "A" 11
"R" 1 "A" 12
"R" 1 "A" 13
"R" 1 "A" 14
"R" 1 "A" 15
"R" 1 "A" 16
"R" 1 "A" 17
"R" 1 "A" 18
"R" 1 "A" 19
"R" 1 "A" 20
"R" 1 "A" 21
"R" 1 "A" 22
"R" 1 "A" 23
"R" 1 "A" 24
"R" 1 "A" 25
"R" 1 "A" 26
"R" 1 "A" 27
"R" 1 "A" 28
"R" 1 "A" 29
"R" 1 "A" 30
"R" 1 "A" 31
!entry.CPH.unit.name single str
"3-CPROXYLH"
!entry.CPH.unit.positions table  dbl x  dbl y  dbl z
0.0 0.0 0.0
0.0 0.0 1.479000
1.331000 0.0 2.125000
2.254000 -0.210000 0.920000
1.486000 0.352000 -0.277000
-1.070000 -0.057000 2.140000
1.546000 1.354000 2.807000
1.407000 -1.129000 3.145000
-0.976000 1.050000 -0.512000
-0.399000 -1.394000 -0.492000
2.503000 1.364000 3.341000
1.549000 2.173000 2.079000
0.742000 1.538000 3.526000
2.398000 -1.148000 3.612000
0.653000 -0.985000 3.925000
1.228000 -2.099000 2.669000
-0.962000 1.078000 -1.606000
-1.987000 0.809000 -0.172000
-0.715000 2.044000 -0.132000
-0.499000 -1.409000 -1.583000
0.333000 -2.154000 -0.200000
-1.366000 -1.658000 -0.053000
3.222000 0.282000 1.053000
2.447000 -1.275000 0.758000
```



```
"C9" "CT" 0 1 131074 9 6 -0.106000
"C10" "CT" 0 1 131074 10 6 -0.106000
"H11" "HN" 0 1 131074 11 1 0.022000
"H12" "HN" 0 1 131074 12 1 0.022000
"H13" "HN" 0 1 131074 13 1 0.022000
"H14" "HN" 0 1 131074 14 1 0.022000
"H15" "HN" 0 1 131074 15 1 0.022000
"H16" "HN" 0 1 131074 16 1 0.022000
"H17" "HN" 0 1 131074 17 1 0.022000
"H18" "HN" 0 1 131074 18 1 0.022000
"H19" "HN" 0 1 131074 19 1 0.022000
"H20" "HN" 0 1 131074 20 1 0.022000
"H21" "HN" 0 1 131074 21 1 0.022000
"H22" "HN" 0 1 131074 22 1 0.022000
"H23" "HC" 0 1 131074 23 1 0.010000
"H24" "HC" 0 1 131074 24 1 0.010000
"H25" "HC" 0 1 131074 25 1 -0.026000
"C26" "C" 0 1 131074 26 6 0.720000
"O27" "O2" 0 1 131074 27 8 -0.822000
"O28" "O2" 0 1 131074 28 8 -0.822000
"Lp1" "LP" 0 1 131074 29 0 -0.110000
"Lp2" "LP" 0 1 131074 30 0 -0.110000
!entry.CPR.unit.atomsperinfo table str pname str ptype int ptypex int pelmnt dbl
pchg
"C1" "CT" 0 -1 0.0
"N2" "NN" 0 -1 0.0
"C3" "CT" 0 -1 0.0
"C4" "CT" 0 -1 0.0
"C5" "CT" 0 -1 0.0
"O6" "ON" 0 -1 0.0
"C7" "CT" 0 -1 0.0
"C8" "CT" 0 -1 0.0
"C9" "CT" 0 -1 0.0
"C10" "CT" 0 -1 0.0
"H11" "HN" 0 -1 0.0
"H12" "HN" 0 -1 0.0
"H13" "HN" 0 -1 0.0
"H14" "HN" 0 -1 0.0
"H15" "HN" 0 -1 0.0
"H16" "HN" 0 -1 0.0
"H17" "HN" 0 -1 0.0
"H18" "HN" 0 -1 0.0
"H19" "HN" 0 -1 0.0
"H20" "HN" 0 -1 0.0
"H21" "HN" 0 -1 0.0
"H22" "HN" 0 -1 0.0
"H23" "HC" 0 -1 0.0
"H24" "HC" 0 -1 0.0
"H25" "HC" 0 -1 0.0
"C26" "C" 0 -1 0.0
"O27" "O2" 0 -1 0.0
"O28" "O2" 0 -1 0.0
"Lp1" "LP" 0 -1 0.0
"Lp2" "LP" 0 -1 0.0
!entry.CPR.unit.boundbox array dbl
-1.000000
0.0
0.0
0.0
0.0
!entry.CPR.unit.childsequence single int
2
!entry.CPR.unit.connect array int
```

```
0
0
!entry.CPR.unit.connectivity table  int atom1x  int atom2x  int flags
1 9 1
1 10 1
1 5 1
1 2 1
2 3 1
2 6 1
3 4 1
3 7 1
3 8 1
4 5 1
4 24 1
4 23 1
5 26 1
5 25 1
6 29 1
6 30 1
7 12 1
7 11 1
7 13 1
8 16 1
8 14 1
8 15 1
9 17 1
9 18 1
9 19 1
10 20 1
10 21 1
10 22 1
26 28 1
26 27 1
!entry.CPR.unit.hierarchy table  str abovetype  int abovex  str belowtype  int belowx
"U" 0 "R" 1
"R" 1 "A" 1
"R" 1 "A" 2
"R" 1 "A" 3
"R" 1 "A" 4
"R" 1 "A" 5
"R" 1 "A" 6
"R" 1 "A" 7
"R" 1 "A" 8
"R" 1 "A" 9
"R" 1 "A" 10
"R" 1 "A" 11
"R" 1 "A" 12
"R" 1 "A" 13
"R" 1 "A" 14
"R" 1 "A" 15
"R" 1 "A" 16
"R" 1 "A" 17
"R" 1 "A" 18
"R" 1 "A" 19
"R" 1 "A" 20
"R" 1 "A" 21
"R" 1 "A" 22
"R" 1 "A" 23
"R" 1 "A" 24
"R" 1 "A" 25
"R" 1 "A" 26
"R" 1 "A" 27
"R" 1 "A" 28
```



```
0.0 0.0 0.0
0.0 0.0 0.0
0.0 0.0 0.0
0.0 0.0 0.0
0.0 0.0 0.0
0.0 0.0 0.0
0.0 0.0 0.0
0.0 0.0 0.0
0.0 0.0 0.0
0.0 0.0 0.0
0.0 0.0 0.0
0.0 0.0 0.0
0.0 0.0 0.0
0.0 0.0 0.0
0.0 0.0 0.0
0.0 0.0 0.0
0.0 0.0 0.0
!entry.CTH.unit.atoms table str name str type int typex int resx int flags int seq
int elmnt dbl chg
"N1" "NN" 0 1 131074 1 7 0.037000
"C2" "CT" 0 1 131074 2 6 0.189000
"C3" "CT" 0 1 131074 3 6 -0.063000
"C4" "CT" 0 1 131074 4 6 -0.054000
"C5" "CT" 0 1 131074 5 6 -0.063000
"C6" "CT" 0 1 131074 6 6 0.189000
"C7" "CT" 0 1 131074 7 6 -0.089000
"C8" "CT" 0 1 131074 8 6 -0.089000
"C9" "CT" 0 1 131074 9 6 -0.089000
"C10" "CT" 0 1 131074 10 6 -0.089000
"O11" "ON" 0 1 131074 11 8 -0.118000
"H12" "HC" 0 1 131074 12 1 0.038000
"H13" "HC" 0 1 131074 13 1 0.024000
"H14" "HC" 0 1 131074 14 1 0.024000
"H15" "HC" 0 1 131074 15 1 0.024000
"H16" "HC" 0 1 131074 16 1 0.024000
"H17" "HN" 0 1 131074 17 1 0.027000
"H18" "HN" 0 1 131074 18 1 0.027000
"H19" "HN" 0 1 131074 19 1 0.027000
"H20" "HN" 0 1 131074 20 1 0.027000
"H21" "HN" 0 1 131074 21 1 0.027000
"H22" "HN" 0 1 131074 22 1 0.027000
"H23" "HN" 0 1 131074 23 1 0.027000
"H24" "HN" 0 1 131074 24 1 0.027000
"H25" "HN" 0 1 131074 25 1 0.027000
"H26" "HN" 0 1 131074 26 1 0.027000
"H27" "HN" 0 1 131074 27 1 0.027000
"H28" "HN" 0 1 131074 28 1 0.027000
"C29" "C" 0 1 131074 29 6 0.680100
"O30" "O" 0 1 131074 30 8 -0.542100
"O31" "OH" 0 1 131074 31 8 -0.621100
"H32" "HO" 0 1 131074 32 1 0.484100
"Lp1" "LP" 0 1 131074 33 0 -0.110000
"Lp2" "LP" 0 1 131074 34 0 -0.110000
!entry.CTH.unit.atoms pertinfo table str pname str ptype int ptypex int pelmnt dbl
pchg
"N1" "NN" 0 -1 0.0
"C2" "CT" 0 -1 0.0
"C3" "CT" 0 -1 0.0
"C4" "CT" 0 -1 0.0
"C5" "CT" 0 -1 0.0
"C6" "CT" 0 -1 0.0
"C7" "CT" 0 -1 0.0
"C8" "CT" 0 -1 0.0
```

```
"C9" "CT" 0 -1 0.0
"C10" "CT" 0 -1 0.0
"O11" "ON" 0 -1 0.0
"H12" "HC" 0 -1 0.0
"H13" "HC" 0 -1 0.0
"H14" "HC" 0 -1 0.0
"H15" "HC" 0 -1 0.0
"H16" "HC" 0 -1 0.0
"H17" "HN" 0 -1 0.0
"H18" "HN" 0 -1 0.0
"H19" "HN" 0 -1 0.0
"H20" "HN" 0 -1 0.0
"H21" "HN" 0 -1 0.0
"H22" "HN" 0 -1 0.0
"H23" "HN" 0 -1 0.0
"H24" "HN" 0 -1 0.0
"H25" "HN" 0 -1 0.0
"H26" "HN" 0 -1 0.0
"H27" "HN" 0 -1 0.0
"H28" "HN" 0 -1 0.0
"C29" "C" 0 -1 0.0
"O30" "O" 0 -1 0.0
"O31" "OH" 0 -1 0.0
"H32" "HO" 0 -1 0.0
"Lp1" "LP" 0 -1 0.0
"Lp2" "LP" 0 -1 0.0
!entry.CTH.unit.boundbox array dbl
-1.000000
0.0
0.0
0.0
0.0
!entry.CTH.unit.childsequence single int
2
!entry.CTH.unit.connect array int
0
0
!entry.CTH.unit.connectivity table int atom1x int atom2x int flags
1 6 1
1 11 1
1 2 1
2 8 1
2 7 1
2 3 1
3 4 1
3 14 1
3 13 1
4 5 1
4 12 1
4 29 1
5 6 1
5 15 1
5 16 1
6 9 1
6 10 1
7 24 1
7 23 1
7 25 1
8 27 1
8 26 1
8 28 1
9 19 1
9 18 1
```



```
9 17 1
10 22 1
10 20 1
10 21 1
11 33 1
11 34 1
29 30 1
29 31 1
31 32 1
!entry.CTH.unit.hierarchy table str abovetype int abovex str belowtype int belowx
"U" 0 "R" 1
"R" 1 "A" 1
"R" 1 "A" 2
"R" 1 "A" 3
"R" 1 "A" 4
"R" 1 "A" 5
"R" 1 "A" 6
"R" 1 "A" 7
"R" 1 "A" 8
"R" 1 "A" 9
"R" 1 "A" 10
"R" 1 "A" 11
"R" 1 "A" 12
"R" 1 "A" 13
"R" 1 "A" 14
"R" 1 "A" 15
"R" 1 "A" 16
"R" 1 "A" 17
"R" 1 "A" 18
"R" 1 "A" 19
"R" 1 "A" 20
"R" 1 "A" 21
"R" 1 "A" 22
"R" 1 "A" 23
"R" 1 "A" 24
"R" 1 "A" 25
"R" 1 "A" 26
"R" 1 "A" 27
"R" 1 "A" 28
"R" 1 "A" 29
"R" 1 "A" 30
"R" 1 "A" 31
"R" 1 "A" 32
"R" 1 "A" 33
"R" 1 "A" 34
!entry.CTH.unit.name single str
"4-CTEMPOH"
!entry.CTH.unit.positions table dbl x dbl y dbl z
0.0 0.0 0.0
0.0 0.0 1.489000
1.436000 0.0 2.023000
2.343000 1.011000 1.323000
2.386000 0.659000 -0.163000
1.011000 0.702000 -0.838000
-0.792000 1.213000 1.996000
-0.698000 -1.282000 1.943000
1.090000 -0.042000 -2.172000
0.549000 2.144000 -1.090000
-1.119000 -0.222000 -0.553000
1.973000 2.032000 1.470000
1.394000 0.192000 3.102000
1.879000 -0.995000 1.893000
3.050000 1.341000 -0.709000
```



0.0 0.0 0.0  
0.0 0.0 0.0  
0.0 0.0 0.0  
0.0 0.0 0.0  
0.0 0.0 0.0

!entry.CTM.unit.atoms table str name str type int typex int resx int flags int seq  
int elmnt dbl chg

"N1" "NN" 0 1 131074 1 7 0.037000  
"C2" "CT" 0 1 131074 2 6 0.189000  
"C3" "CT" 0 1 131074 3 6 -0.073000  
"C4" "CT" 0 1 131074 4 6 -0.105000  
"C5" "CT" 0 1 131074 5 6 -0.073000  
"C6" "CT" 0 1 131074 6 6 0.189000  
"C7" "CT" 0 1 131074 7 6 -0.089000  
"C8" "CT" 0 1 131074 8 6 -0.089000  
"C9" "CT" 0 1 131074 9 6 -0.089000  
"C10" "CT" 0 1 131074 10 6 -0.089000  
"O11" "ON" 0 1 131074 11 8 -0.118000  
"H12" "HC" 0 1 131074 12 1 0.034000  
"H13" "HC" 0 1 131074 13 1 0.024000  
"H14" "HC" 0 1 131074 14 1 0.024000  
"H15" "HC" 0 1 131074 15 1 0.024000  
"H16" "HC" 0 1 131074 16 1 0.024000  
"H17" "HN" 0 1 131074 17 1 0.027000  
"H18" "HN" 0 1 131074 18 1 0.027000  
"H19" "HN" 0 1 131074 19 1 0.027000  
"H20" "HN" 0 1 131074 20 1 0.027000  
"H21" "HN" 0 1 131074 21 1 0.027000  
"H22" "HN" 0 1 131074 22 1 0.027000  
"H23" "HN" 0 1 131074 23 1 0.027000  
"H24" "HN" 0 1 131074 24 1 0.027000  
"H25" "HN" 0 1 131074 25 1 0.027000  
"H26" "HN" 0 1 131074 26 1 0.027000  
"H27" "HN" 0 1 131074 27 1 0.027000  
"H28" "HN" 0 1 131074 28 1 0.027000  
"C29" "C" 0 1 131074 29 6 0.720000  
"O30" "O2" 0 1 131074 30 8 -0.822000  
"O31" "O2" 0 1 131074 31 8 -0.822000  
"Lp1" "LP" 0 1 131074 32 0 -0.110000  
"Lp2" "LP" 0 1 131074 33 0 -0.110000

!entry.CTM.unit.atoms pertinfo table str pname str ptype int ptypex int pelmnt dbl  
pchg

"N1" "NN" 0 -1 0.0  
"C2" "CT" 0 -1 0.0  
"C3" "CT" 0 -1 0.0  
"C4" "CT" 0 -1 0.0  
"C5" "CT" 0 -1 0.0  
"C6" "CT" 0 -1 0.0  
"C7" "CT" 0 -1 0.0  
"C8" "CT" 0 -1 0.0  
"C9" "CT" 0 -1 0.0  
"C10" "CT" 0 -1 0.0  
"O11" "ON" 0 -1 0.0  
"H12" "HC" 0 -1 0.0  
"H13" "HC" 0 -1 0.0  
"H14" "HC" 0 -1 0.0  
"H15" "HC" 0 -1 0.0  
"H16" "HC" 0 -1 0.0  
"H17" "HN" 0 -1 0.0  
"H18" "HN" 0 -1 0.0  
"H19" "HN" 0 -1 0.0  
"H20" "HN" 0 -1 0.0  
"H21" "HN" 0 -1 0.0

```
"H22" "HN" 0 -1 0.0
"H23" "HN" 0 -1 0.0
"H24" "HN" 0 -1 0.0
"H25" "HN" 0 -1 0.0
"H26" "HN" 0 -1 0.0
"H27" "HN" 0 -1 0.0
"H28" "HN" 0 -1 0.0
"C29" "C" 0 -1 0.0
"O30" "O2" 0 -1 0.0
"O31" "O2" 0 -1 0.0
"Lp1" "LP" 0 -1 0.0
"Lp2" "LP" 0 -1 0.0
!entry.CTM.unit.boundbox array dbl
-1.000000
0.0
0.0
0.0
0.0
!entry.CTM.unit.childsequence single int
2
!entry.CTM.unit.connect array int
0
0
!entry.CTM.unit.connectivity table int atom1x int atom2x int flags
1 6 1
1 11 1
1 2 1
2 8 1
2 7 1
2 3 1
3 4 1
3 14 1
3 13 1
4 5 1
4 12 1
4 29 1
5 6 1
5 15 1
5 16 1
6 9 1
6 10 1
7 24 1
7 23 1
7 25 1
8 27 1
8 26 1
8 28 1
9 19 1
9 18 1
9 17 1
10 22 1
10 20 1
10 21 1
11 32 1
11 33 1
29 30 1
29 31 1
!entry.CTM.unit.hierarchy table str abovetype int abovex str belowtype int belowx
"U" 0 "R" 1
"R" 1 "A" 1
"R" 1 "A" 2
"R" 1 "A" 3
"R" 1 "A" 4
```

"R" 1 "A" 5  
"R" 1 "A" 6  
"R" 1 "A" 7  
"R" 1 "A" 8  
"R" 1 "A" 9  
"R" 1 "A" 10  
"R" 1 "A" 11  
"R" 1 "A" 12  
"R" 1 "A" 13  
"R" 1 "A" 14  
"R" 1 "A" 15  
"R" 1 "A" 16  
"R" 1 "A" 17  
"R" 1 "A" 18  
"R" 1 "A" 19  
"R" 1 "A" 20  
"R" 1 "A" 21  
"R" 1 "A" 22  
"R" 1 "A" 23  
"R" 1 "A" 24  
"R" 1 "A" 25  
"R" 1 "A" 26  
"R" 1 "A" 27  
"R" 1 "A" 28  
"R" 1 "A" 29  
"R" 1 "A" 30  
"R" 1 "A" 31  
"R" 1 "A" 32  
"R" 1 "A" 33

!entry.CTM.unit.name single str  
"4-CTEMPO"

!entry.CTM.unit.positions table dbl x dbl y dbl z  
0.0 0.0 0.0  
0.0 0.0 1.490000  
1.433000 0.0 2.033000  
2.377000 0.975000 1.346000  
2.408000 0.610000 -0.131000  
1.047000 0.655000 -0.834000  
-0.784000 1.226000 1.980000  
-0.722000 -1.271000 1.940000  
1.121000 -0.118000 -2.152000  
0.612000 2.099000 -1.121000  
-1.122000 -0.207000 -0.563000  
2.046000 2.011000 1.488000  
1.381000 0.208000 3.111000  
1.874000 -1.000000 1.928000  
3.088000 1.276000 -0.679000  
2.834000 -0.400000 -0.202000  
1.357000 -1.171000 -1.963000  
0.174000 -0.065000 -2.696000  
1.919000 0.308000 -2.771000  
-0.414000 2.113000 -1.504000  
0.667000 2.723000 -0.224000  
1.277000 2.539000 -1.874000  
-0.240000 2.156000 1.791000  
-1.758000 1.272000 1.480000  
-0.946000 1.148000 3.062000  
-1.762000 -1.276000 1.603000  
-0.220000 -2.157000 1.537000  
-0.696000 -1.328000 3.034000  
3.814000 0.868000 1.962000  
4.338000 -0.267000 1.879000  
4.270000 1.918000 2.463000



```
"Lp2" "LP" 0 1 131074 12 0 -0.110000
!entry.DMN.unit.atomsperinfo table str pname str ptype int ptypex int pelmnt dbl
pchg
"N1" "NN" 0 -1 0.0
"O2" "ON" 0 -1 0.0
"C3" "CT" 0 -1 0.0
"C4" "CT" 0 -1 0.0
"H5" "H1" 0 -1 0.0
"H6" "H1" 0 -1 0.0
"H7" "H1" 0 -1 0.0
"H8" "H1" 0 -1 0.0
"H9" "H1" 0 -1 0.0
"H10" "H1" 0 -1 0.0
"Lp1" "LP" 0 -1 0.0
"Lp2" "LP" 0 -1 0.0
!entry.DMN.unit.boundbox array dbl
-1.000000
0.0
0.0
0.0
0.0
!entry.DMN.unit.childsequence single int
2
!entry.DMN.unit.connect array int
0
0
!entry.DMN.unit.connectivity table int atom1x int atom2x int flags
1 4 1
1 3 1
1 2 1
2 11 1
2 12 1
3 8 1
3 9 1
3 10 1
4 5 1
4 7 1
4 6 1
!entry.DMN.unit.hierarchy table str abovetype int abovex str belowtype int belowx
"U" 0 "R" 1
"R" 1 "A" 1
"R" 1 "A" 2
"R" 1 "A" 3
"R" 1 "A" 4
"R" 1 "A" 5
"R" 1 "A" 6
"R" 1 "A" 7
"R" 1 "A" 8
"R" 1 "A" 9
"R" 1 "A" 10
"R" 1 "A" 11
"R" 1 "A" 12
!entry.DMN.unit.name single str
"DMNO"
!entry.DMN.unit.positions table dbl x dbl y dbl z
0.0 0.0 0.0
0.0 0.0 1.268000
1.277000 0.0 -0.686000
-1.161000 0.531000 -0.686000
-1.231000 0.105000 -1.692000
-2.044000 0.262000 -0.104000
-1.102000 1.628000 -0.765000
1.163000 -0.416000 -1.692000
```

```
1.680000 1.021000 -0.765000
1.968000 -0.612000 -0.104000
0.390000 0.0 1.493000
-0.390000 0.0 1.493000
!entry.DMN.unit.residueconnect table int c1x int c2x int c3x int c4x int c5x int
c6x
0 0 0 0 0 0
!entry.DMN.unit.residues table str name int seq int childseq int startatomx str
restype int imagingx
"DMN" 1 13 1 "?" 0
!entry.DMN.unit.residuesPdbSequenceNumber array int
1
!entry.DMN.unit.solventcap array dbl
-1.000000
0.0
0.0
0.0
0.0
!entry.DMN.unit.velocities table dbl x dbl y dbl z
0.0 0.0 0.0
0.0 0.0 0.0
0.0 0.0 0.0
0.0 0.0 0.0
0.0 0.0 0.0
0.0 0.0 0.0
0.0 0.0 0.0
0.0 0.0 0.0
0.0 0.0 0.0
0.0 0.0 0.0
0.0 0.0 0.0
0.0 0.0 0.0
0.0 0.0 0.0
!entry.DTB.unit.atoms table str name str type int typex int resx int flags int seq
int elmnt dbl chg
"N1" "NN" 0 1 131074 1 7 -0.022000
"O2" "ON" 0 1 131074 2 8 -0.060000
"C3" "CT" 0 1 131074 3 6 0.187000
"C4" "CT" 0 1 131074 4 6 0.187000
"C5" "CT" 0 1 131074 5 6 -0.114000
"H6" "HN" 0 1 131074 6 1 0.034000
"H7" "HN" 0 1 131074 7 1 0.034000
"H8" "HN" 0 1 131074 8 1 0.034000
"C9" "CT" 0 1 131074 9 6 -0.114000
"H10" "HN" 0 1 131074 10 1 0.034000
"H11" "HN" 0 1 131074 11 1 0.034000
"H12" "HN" 0 1 131074 12 1 0.034000
"C13" "CT" 0 1 131074 13 6 -0.114000
"H14" "HN" 0 1 131074 14 1 0.034000
"H15" "HN" 0 1 131074 15 1 0.034000
"H16" "HN" 0 1 131074 16 1 0.034000
"C17" "CT" 0 1 131074 17 6 -0.114000
"H18" "HN" 0 1 131074 18 1 0.034000
"H19" "HN" 0 1 131074 19 1 0.034000
"H20" "HN" 0 1 131074 20 1 0.034000
"C21" "CT" 0 1 131074 21 6 -0.114000
"H22" "HN" 0 1 131074 22 1 0.034000
"H23" "HN" 0 1 131074 23 1 0.034000
"H24" "HN" 0 1 131074 24 1 0.034000
"C25" "CT" 0 1 131074 25 6 -0.114000
"H26" "HN" 0 1 131074 26 1 0.034000
"H27" "HN" 0 1 131074 27 1 0.034000
"H28" "HN" 0 1 131074 28 1 0.034000
"Lp1" "LP" 0 1 131074 29 0 -0.110000
"Lp2" "LP" 0 1 131074 30 0 -0.110000
```



```
!entry.DTB.unit.atomsperinfo table str pname str ptype int ptypex int pelmnt dbl
pchg
"N1" "NN" 0 -1 0.0
"O2" "ON" 0 -1 0.0
"C3" "CT" 0 -1 0.0
"C4" "CT" 0 -1 0.0
"C5" "CT" 0 -1 0.0
"H6" "HN" 0 -1 0.0
"H7" "HN" 0 -1 0.0
"H8" "HN" 0 -1 0.0
"C9" "CT" 0 -1 0.0
"H10" "HN" 0 -1 0.0
"H11" "HN" 0 -1 0.0
"H12" "HN" 0 -1 0.0
"C13" "CT" 0 -1 0.0
"H14" "HN" 0 -1 0.0
"H15" "HN" 0 -1 0.0
"H16" "HN" 0 -1 0.0
"C17" "CT" 0 -1 0.0
"H18" "HN" 0 -1 0.0
"H19" "HN" 0 -1 0.0
"H20" "HN" 0 -1 0.0
"C21" "CT" 0 -1 0.0
"H22" "HN" 0 -1 0.0
"H23" "HN" 0 -1 0.0
"H24" "HN" 0 -1 0.0
"C25" "CT" 0 -1 0.0
"H26" "HN" 0 -1 0.0
"H27" "HN" 0 -1 0.0
"H28" "HN" 0 -1 0.0
"Lp1" "LP" 0 -1 0.0
"Lp2" "LP" 0 -1 0.0
!entry.DTB.unit.boundbox array dbl
-1.000000
0.0
0.0
0.0
0.0
!entry.DTB.unit.childsequence single int
2
!entry.DTB.unit.connect array int
0
0
!entry.DTB.unit.connectivity table int atom1x int atom2x int flags
1 2 1
1 3 1
1 4 1
2 30 1
2 29 1
3 25 1
3 21 1
3 17 1
4 9 1
4 13 1
4 5 1
5 6 1
5 7 1
5 8 1
9 12 1
9 11 1
9 10 1
13 15 1
13 14 1
```

13 16 1  
17 20 1  
17 18 1  
17 19 1  
21 23 1  
21 24 1  
21 22 1  
25 27 1  
25 28 1  
25 26 1

!entry.DTB.unit.hierarchy table str abovetype int abovex str belowtype int belowx

"U" 0 "R" 1  
"R" 1 "A" 1  
"R" 1 "A" 2  
"R" 1 "A" 3  
"R" 1 "A" 4  
"R" 1 "A" 5  
"R" 1 "A" 6  
"R" 1 "A" 7  
"R" 1 "A" 8  
"R" 1 "A" 9  
"R" 1 "A" 10  
"R" 1 "A" 11  
"R" 1 "A" 12  
"R" 1 "A" 13  
"R" 1 "A" 14  
"R" 1 "A" 15  
"R" 1 "A" 16  
"R" 1 "A" 17  
"R" 1 "A" 18  
"R" 1 "A" 19  
"R" 1 "A" 20  
"R" 1 "A" 21  
"R" 1 "A" 22  
"R" 1 "A" 23  
"R" 1 "A" 24  
"R" 1 "A" 25  
"R" 1 "A" 26  
"R" 1 "A" 27  
"R" 1 "A" 28  
"R" 1 "A" 29  
"R" 1 "A" 30

!entry.DTB.unit.name single str  
"DTBN"

!entry.DTB.unit.positions table dbl x dbl y dbl z

0.003000 -0.482000 -0.186000  
-0.035000 -1.755000 -0.092000  
1.352000 0.157000 -0.013000  
-1.342000 0.163000 -0.012000  
-1.821000 -0.099000 1.423000  
-2.862000 0.222000 1.532000  
-1.759000 -1.168000 1.644000  
-1.220000 0.448000 2.156000  
-2.284000 -0.534000 -1.000000  
-2.322000 -1.607000 -0.806000  
-3.291000 -0.116000 -0.901000  
-1.945000 -0.380000 -2.030000  
-1.369000 1.661000 -0.306000  
-2.395000 2.009000 -0.152000  
-1.100000 1.880000 -1.342000  
-0.731000 2.246000 0.361000  
1.500000 0.743000 1.398000  
0.814000 1.573000 1.584000



```
"C5" "CA" 0 1 131072 5 6 -0.154500
"C6" "CA" 0 1 131072 6 6 -0.101600
"C7" "CI" 0 1 131072 7 6 0.150700
"C8" "C" 0 1 131072 8 6 0.400900
"H1" "HA" 0 1 131072 9 1 0.151900
"H2" "HA" 0 1 131072 10 1 0.137300
"H3" "HA" 0 1 131072 11 1 0.145900
"H4" "HA" 0 1 131072 12 1 0.142100
"O1" "O" 0 1 131072 13 8 -0.467400
"O2" "ON" 0 1 131072 14 8 -0.127800
"N1" "NN" 0 1 131072 15 7 0.091200
"C9" "CA" 0 1 131072 16 6 -0.015600
"C10" "CA" 0 1 131072 17 6 -0.131600
"C11" "CA" 0 1 131072 18 6 -0.131600
"C12" "CA" 0 1 131072 19 6 -0.156700
"H5" "HA" 0 1 131072 20 1 0.148700
"C13" "CA" 0 1 131072 21 6 -0.156700
"H6" "HA" 0 1 131072 22 1 0.148700
"C14" "CA" 0 1 131072 23 6 -0.123900
"H7" "HA" 0 1 131072 24 1 0.140200
"H8" "HA" 0 1 131072 25 1 0.140200
"H9" "HA" 0 1 131072 26 1 0.136500
"C15" "CT" 0 1 131072 27 6 -0.081800
"H10" "HC" 0 1 131072 28 1 0.044800
"H11" "HC" 0 1 131072 29 1 0.044800
"H12" "HC" 0 1 131072 30 1 0.044800
"Lp1" "LP" 0 1 131072 31 0 -0.109800
"Lp2" "LP" 0 1 131072 32 0 -0.109800
!entry.IND.unit.atomsperinfo table str pname str ptype int ptypex int pelmnt dbl
pchg
"C1" "CN" 0 -1 0.0
"C2" "CB" 0 -1 0.0
"C3" "CA" 0 -1 0.0
"C4" "CA" 0 -1 0.0
"C5" "CA" 0 -1 0.0
"C6" "CA" 0 -1 0.0
"C7" "CI" 0 -1 0.0
"C8" "C" 0 -1 0.0
"H1" "HA" 0 -1 0.0
"H2" "HA" 0 -1 0.0
"H3" "HA" 0 -1 0.0
"H4" "HA" 0 -1 0.0
"O1" "O" 0 -1 0.0
"O2" "ON" 0 -1 0.0
"N1" "NN" 0 -1 0.0
"C9" "CA" 0 -1 0.0
"C10" "CA" 0 -1 0.0
"C11" "CA" 0 -1 0.0
"C12" "CA" 0 -1 0.0
"H5" "HA" 0 -1 0.0
"C13" "CA" 0 -1 0.0
"H6" "HA" 0 -1 0.0
"C14" "CA" 0 -1 0.0
"H7" "HA" 0 -1 0.0
"H8" "HA" 0 -1 0.0
"H9" "HA" 0 -1 0.0
"C15" "CT" 0 -1 0.0
"H10" "HC" 0 -1 0.0
"H11" "HC" 0 -1 0.0
"H12" "HC" 0 -1 0.0
"Lp1" "LP" 0 -1 0.0
"Lp2" "LP" 0 -1 0.0
!entry.IND.unit.boundbox array dbl
```

```
-1.000000
0.0
0.0
0.0
0.0
!entry.IND.unit.childsequence single int
2
!entry.IND.unit.connect array int
0
0
!entry.IND.unit.connectivity table  int atom1x  int atom2x  int flags
1 6 1
1 2 1
1 15 1
2 3 1
2 8 1
3 4 1
3 9 1
4 5 1
4 10 1
5 6 1
5 11 1
6 12 1
7 8 1
7 15 1
7 27 1
7 16 1
8 13 1
14 15 1
14 32 1
14 31 1
16 17 1
16 18 1
17 19 1
17 20 1
18 21 1
18 22 1
19 23 1
19 24 1
21 23 1
21 25 1
23 26 1
27 30 1
27 28 1
27 29 1
!entry.IND.unit.hierarchy table  str abovetype  int abovex  str belowtype  int belowx
"U" 0 "R" 1
"R" 1 "A" 1
"R" 1 "A" 2
"R" 1 "A" 3
"R" 1 "A" 4
"R" 1 "A" 5
"R" 1 "A" 6
"R" 1 "A" 7
"R" 1 "A" 8
"R" 1 "A" 9
"R" 1 "A" 10
"R" 1 "A" 11
"R" 1 "A" 12
"R" 1 "A" 13
"R" 1 "A" 14
"R" 1 "A" 15
"R" 1 "A" 16
```

```
"R" 1 "A" 17
"R" 1 "A" 18
"R" 1 "A" 19
"R" 1 "A" 20
"R" 1 "A" 21
"R" 1 "A" 22
"R" 1 "A" 23
"R" 1 "A" 24
"R" 1 "A" 25
"R" 1 "A" 26
"R" 1 "A" 27
"R" 1 "A" 28
"R" 1 "A" 29
"R" 1 "A" 30
"R" 1 "A" 31
"R" 1 "A" 32
!entry.IND.unit.name single str
"INDCO"
!entry.IND.unit.positions table  dbl x  dbl y  dbl z
0.0 0.0 0.0
0.0 0.0 1.402000
1.199000 0.0 2.109000
2.388000 0.007000 1.386000
2.371000 0.001000 -0.020000
1.183000 -0.006000 -0.741000
-2.295000 0.037000 0.608000
-1.392000 -0.047000 1.866000
1.189000 -0.006000 3.196000
3.341000 0.012000 1.908000
3.316000 0.001000 -0.559000
1.157000 -0.017000 -1.826000
-1.800000 -0.156000 2.998000
-1.604000 -0.120000 -1.700000
-1.296000 -0.015000 -0.486000
-3.054000 1.361000 0.607000
-3.931000 1.634000 1.663000
-2.904000 2.305000 -0.412000
-4.646000 2.827000 1.696000
-4.034000 0.920000 2.476000
-3.624000 3.498000 -0.375000
-2.242000 2.107000 -1.249000
-4.497000 3.764000 0.676000
-5.320000 3.025000 2.527000
-3.500000 4.221000 -1.178000
-5.057000 4.696000 0.701000
-3.223000 -1.170000 0.511000
-3.908000 -1.170000 1.362000
-3.795000 -1.116000 -0.419000
-2.649000 -2.103000 0.524000
-1.281000 -0.157000 -2.011000
-2.037000 -0.121000 -1.823000
!entry.IND.unit.residueconnect table  int c1x  int c2x  int c3x  int c4x  int c5x  int
c6x
0 0 0 0 0 0
!entry.IND.unit.residues table  str name  int seq  int childseq  int startatomx  str
restype  int imagingx
"IND" 1 33 1 "?" 0
!entry.IND.unit.residuesPdbSequenceNumber array int
1
!entry.IND.unit.solventcap array dbl
-1.000000
0.0
0.0
```



```
"H3" "H1" 0 -1 0.0
"H4" "H1" 0 -1 0.0
"N1" "NN" 0 -1 0.0
"N2" "NN" 0 -1 0.0
"O1" "ON" 0 -1 0.0
"O2" "ON" 0 -1 0.0
"C4" "CT" 0 -1 0.0
"H5" "HC" 0 -1 0.0
"H6" "HC" 0 -1 0.0
"H7" "HC" 0 -1 0.0
"Lp1" "LP" 0 -1 0.0
"Lp2" "LP" 0 -1 0.0
"Lp3" "LP" 0 -1 0.0
"Lp4" "LP" 0 -1 0.0
!entry.NIT.unit.boundbox array dbl
-1.000000
0.0
0.0
0.0
0.0
!entry.NIT.unit.childsequence single int
2
!entry.NIT.unit.connect array int
0
0
!entry.NIT.unit.connectivity table int atom1x int atom2x int flags
1 5 1
1 4 1
1 8 1
1 2 1
2 7 1
2 6 1
2 9 1
3 9 1
3 8 1
3 12 1
8 10 1
9 11 1
10 17 1
10 16 1
11 19 1
11 18 1
12 15 1
12 13 1
12 14 1
!entry.NIT.unit.hierarchy table str abovetype int abovex str belowtype int belowx
"U" 0 "R" 1
"R" 1 "A" 1
"R" 1 "A" 2
"R" 1 "A" 3
"R" 1 "A" 4
"R" 1 "A" 5
"R" 1 "A" 6
"R" 1 "A" 7
"R" 1 "A" 8
"R" 1 "A" 9
"R" 1 "A" 10
"R" 1 "A" 11
"R" 1 "A" 12
"R" 1 "A" 13
"R" 1 "A" 14
"R" 1 "A" 15
"R" 1 "A" 16
```



```
"R" 1 "A" 17
"R" 1 "A" 18
"R" 1 "A" 19
!entry.NIT.unit.name single str
"NITNO"
!entry.NIT.unit.positions table  dbl x  dbl y  dbl z
0.0 0.0 0.0
0.0 0.0 1.529000
2.201000 0.0 0.767000
-0.454000 -0.890000 -0.444000
-0.455000 0.890000 -0.444000
-0.454000 -0.890000 1.973000
-0.455000 0.890000 1.973000
1.435000 0.0 -0.338000
1.435000 0.001000 1.872000
1.841000 0.0 -1.530000
1.826000 0.002000 3.069000
3.673000 -0.003000 0.758000
4.052000 -0.600000 1.593000
4.048000 -0.457000 -0.166000
4.029000 1.027000 0.834000
2.282000 0.0 -1.618000
1.544000 0.0 -1.869000
2.266000 0.002000 3.161000
1.526000 0.001000 3.404000
!entry.NIT.unit.residueconnect table  int c1x  int c2x  int c3x  int c4x  int c5x  int
c6x
0 0 0 0 0 0
!entry.NIT.unit.residues table  str name  int seq  int childseq  int startatomx  str
restype  int imagingx
"NIT" 1 21 1 "?" 0
!entry.NIT.unit.residuesPdbSequenceNumber array int
1
!entry.NIT.unit.solventcap array dbl
-1.000000
0.0
0.0
0.0
0.0
!entry.NIT.unit.velocities table  dbl x  dbl y  dbl z
0.0 0.0 0.0
0.0 0.0 0.0
0.0 0.0 0.0
0.0 0.0 0.0
0.0 0.0 0.0
0.0 0.0 0.0
0.0 0.0 0.0
0.0 0.0 0.0
0.0 0.0 0.0
0.0 0.0 0.0
0.0 0.0 0.0
0.0 0.0 0.0
0.0 0.0 0.0
0.0 0.0 0.0
0.0 0.0 0.0
0.0 0.0 0.0
0.0 0.0 0.0
0.0 0.0 0.0
0.0 0.0 0.0
0.0 0.0 0.0
0.0 0.0 0.0
0.0 0.0 0.0
0.0 0.0 0.0
!entry.OPR.unit.atoms table  str name  str type  int typex  int resx  int flags  int seq
int elmnt  dbl chg
"C1" "CT" 0 1 131072 1 6 -0.136000
"C2" "CT" 0 1 131072 2 6 0.287000
```

```
"C3" "CP" 0 1 131072 3 6 0.287000
"H1" "HC" 0 1 131072 4 1 0.060000
"H3" "HC" 0 1 131072 5 1 0.060000
"N1" "NN" 0 1 131072 6 7 0.080000
"O1" "ON" 0 1 131072 7 8 -0.184000
"C4" "CT" 0 1 131072 8 6 -0.106000
"H4" "HN" 0 1 131072 9 1 0.022000
"H5" "HN" 0 1 131072 10 1 0.022000
"H6" "HN" 0 1 131072 11 1 0.022000
"C5" "CT" 0 1 131072 12 6 -0.106000
"H7" "HN" 0 1 131072 13 1 0.022000
"H8" "HN" 0 1 131072 14 1 0.022000
"H9" "HN" 0 1 131072 15 1 0.022000
"C6" "CT" 0 1 131072 16 6 -0.106000
"H10" "HN" 0 1 131072 17 1 0.022000
"H11" "HN" 0 1 131072 18 1 0.022000
"H12" "HN" 0 1 131072 19 1 0.022000
"C7" "CT" 0 1 131072 20 6 -0.106000
"H13" "HN" 0 1 131072 21 1 0.022000
"H14" "HN" 0 1 131072 22 1 0.022000
"H15" "HN" 0 1 131072 23 1 0.022000
"C8" "C" 0 1 131072 24 6 0.444000
"O2" "O" 0 1 131072 25 8 -0.518000
"Lp1" "LP" 0 1 131072 26 0 -0.110000
"Lp2" "LP" 0 1 131072 27 0 -0.110000
!entry.OPR.unit.atomsperinfo table str pname str ptype int ptypex int pelmnt dbl
pchg
"C1" "CT" 0 -1 0.0
"C2" "CT" 0 -1 0.0
"C3" "CP" 0 -1 0.0
"H1" "HC" 0 -1 0.0
"H3" "HC" 0 -1 0.0
"N1" "NN" 0 -1 0.0
"O1" "ON" 0 -1 0.0
"C4" "CT" 0 -1 0.0
"H4" "HN" 0 -1 0.0
"H5" "HN" 0 -1 0.0
"H6" "HN" 0 -1 0.0
"C5" "CT" 0 -1 0.0
"H7" "HN" 0 -1 0.0
"H8" "HN" 0 -1 0.0
"H9" "HN" 0 -1 0.0
"C6" "CT" 0 -1 0.0
"H10" "HN" 0 -1 0.0
"H11" "HN" 0 -1 0.0
"H12" "HN" 0 -1 0.0
"C7" "CT" 0 -1 0.0
"H13" "HN" 0 -1 0.0
"H14" "HN" 0 -1 0.0
"H15" "HN" 0 -1 0.0
"C8" "C" 0 -1 0.0
"O2" "O" 0 -1 0.0
"LP1" "LP" 0 -1 0.0
"LP2" "LP" 0 -1 0.0
!entry.OPR.unit.boundbox array dbl
-1.000000
0.0
0.0
0.0
0.0
!entry.OPR.unit.childsequence single int
2
!entry.OPR.unit.connect array int
```

```
0
0
!entry.OPR.unit.connectivity table  int atom1x  int atom2x  int flags
1 2 1
1 24 1
1 5 1
1 4 1
2 6 1
2 16 1
2 20 1
3 6 1
3 24 1
3 8 1
3 12 1
6 7 1
7 26 1
7 27 1
8 9 1
8 11 1
8 10 1
12 14 1
12 13 1
12 15 1
16 18 1
16 17 1
16 19 1
20 23 1
20 22 1
20 21 1
24 25 1
!entry.OPR.unit.hierarchy table  str abovetype  int abovex  str belowtype  int belowx
"U" 0 "R" 1
"R" 1 "A" 1
"R" 1 "A" 2
"R" 1 "A" 3
"R" 1 "A" 4
"R" 1 "A" 5
"R" 1 "A" 6
"R" 1 "A" 7
"R" 1 "A" 8
"R" 1 "A" 9
"R" 1 "A" 10
"R" 1 "A" 11
"R" 1 "A" 12
"R" 1 "A" 13
"R" 1 "A" 14
"R" 1 "A" 15
"R" 1 "A" 16
"R" 1 "A" 17
"R" 1 "A" 18
"R" 1 "A" 19
"R" 1 "A" 20
"R" 1 "A" 21
"R" 1 "A" 22
"R" 1 "A" 23
"R" 1 "A" 24
"R" 1 "A" 25
"R" 1 "A" 26
"R" 1 "A" 27
!entry.OPR.unit.name single str
"3-Oxo-PROXYL"
!entry.OPR.unit.positions table  dbl x  dbl y  dbl z
0.0 0.0 0.0
```



0.0 0.0 0.0  
0.0 0.0 0.0  
0.0 0.0 0.0  
0.0 0.0 0.0  
0.0 0.0 0.0

!entry.OTM.unit.atoms table str name str type int typex int resx int flags int seq  
int elmnt dbl chg

"N1" "NN" 0 1 131074 1 7 0.037000  
"C2" "CT" 0 1 131074 2 6 0.189000  
"C3" "CT" 0 1 131074 3 6 -0.055000  
"C4" "CT" 0 1 131074 4 6 -0.055000  
"C5" "CT" 0 1 131074 5 6 0.189000  
"C6" "CT" 0 1 131074 6 6 -0.089000  
"C7" "CT" 0 1 131074 7 6 -0.089000  
"C8" "CT" 0 1 131074 8 6 -0.089000  
"C9" "CT" 0 1 131074 9 6 -0.089000  
"O10" "ON" 0 1 131074 10 8 -0.118000  
"H11" "HC" 0 1 131074 11 1 0.034000  
"H12" "HC" 0 1 131074 12 1 0.034000  
"H13" "HC" 0 1 131074 13 1 0.034000  
"H14" "HC" 0 1 131074 14 1 0.034000  
"H15" "HN" 0 1 131074 15 1 0.027000  
"H16" "HN" 0 1 131074 16 1 0.027000  
"H17" "HN" 0 1 131074 17 1 0.027000  
"H18" "HN" 0 1 131074 18 1 0.027000  
"H19" "HN" 0 1 131074 19 1 0.027000  
"H20" "HN" 0 1 131074 20 1 0.027000  
"H21" "HN" 0 1 131074 21 1 0.027000  
"H22" "HN" 0 1 131074 22 1 0.027000  
"H23" "HN" 0 1 131074 23 1 0.027000  
"H24" "HN" 0 1 131074 24 1 0.027000  
"H25" "HN" 0 1 131074 25 1 0.027000  
"H26" "HN" 0 1 131074 26 1 0.027000  
"C27" "C" 0 1 131074 27 6 0.420000  
"O28" "O" 0 1 131074 28 8 -0.491000  
"Lp1" "LP" 0 1 131074 29 0 -0.110000  
"Lp2" "LP" 0 1 131074 30 0 -0.110000

!entry.OTM.unit.atoms pertinfo table str pname str ptype int ptypex int pelmnt dbl  
pchg

"N1" "NN" 0 -1 0.0  
"C2" "CT" 0 -1 0.0  
"C3" "CT" 0 -1 0.0  
"C4" "CT" 0 -1 0.0  
"C5" "CT" 0 -1 0.0  
"C6" "CT" 0 -1 0.0  
"C7" "CT" 0 -1 0.0  
"C8" "CT" 0 -1 0.0  
"C9" "CT" 0 -1 0.0  
"O10" "ON" 0 -1 0.0  
"H11" "HC" 0 -1 0.0  
"H12" "HC" 0 -1 0.0  
"H13" "HC" 0 -1 0.0  
"H14" "HC" 0 -1 0.0  
"H15" "HN" 0 -1 0.0  
"H16" "HN" 0 -1 0.0  
"H17" "HN" 0 -1 0.0  
"H18" "HN" 0 -1 0.0  
"H19" "HN" 0 -1 0.0  
"H20" "HN" 0 -1 0.0  
"H21" "HN" 0 -1 0.0  
"H22" "HN" 0 -1 0.0  
"H23" "HN" 0 -1 0.0  
"H24" "HN" 0 -1 0.0

```
"H25" "HN" 0 -1 0.0
"H26" "HN" 0 -1 0.0
"C27" "C" 0 -1 0.0
"O28" "O" 0 -1 0.0
"Lp1" "LP" 0 -1 0.0
"Lp2" "LP" 0 -1 0.0
!entry.OTM.unit.boundingBox array dbl
-1.000000
0.0
0.0
0.0
0.0
!entry.OTM.unit.childSequence single int
2
!entry.OTM.unit.connect array int
0
0
!entry.OTM.unit.connectivity table int atom1x int atom2x int flags
1 10 1
1 2 1
1 5 1
2 7 1
2 6 1
2 3 1
3 12 1
3 11 1
3 27 1
4 5 1
4 13 1
4 14 1
4 27 1
5 9 1
5 8 1
6 22 1
6 23 1
6 21 1
7 24 1
7 25 1
7 26 1
8 16 1
8 17 1
8 15 1
9 18 1
9 19 1
9 20 1
10 29 1
10 30 1
27 28 1
!entry.OTM.unit.hierarchy table str abovetype int abovex str belowtype int belowx
"U" 0 "R" 1
"R" 1 "A" 1
"R" 1 "A" 2
"R" 1 "A" 3
"R" 1 "A" 4
"R" 1 "A" 5
"R" 1 "A" 6
"R" 1 "A" 7
"R" 1 "A" 8
"R" 1 "A" 9
"R" 1 "A" 10
"R" 1 "A" 11
"R" 1 "A" 12
"R" 1 "A" 13
```

```
"R" 1 "A" 14
"R" 1 "A" 15
"R" 1 "A" 16
"R" 1 "A" 17
"R" 1 "A" 18
"R" 1 "A" 19
"R" 1 "A" 20
"R" 1 "A" 21
"R" 1 "A" 22
"R" 1 "A" 23
"R" 1 "A" 24
"R" 1 "A" 25
"R" 1 "A" 26
"R" 1 "A" 27
"R" 1 "A" 28
"R" 1 "A" 29
"R" 1 "A" 30
!entry.OTM.unit.name single str
"4-Oxo-TEMPO"
!entry.OTM.unit.positions table  dbl x  dbl y  dbl z
0.0 0.0 -1.011000
-1.311000 0.003000 -0.313000
-1.142000 -0.578000 1.095000
1.142000 0.578000 1.095000
1.311000 -0.003000 -0.313000
-1.840000 1.443000 -0.264000
-2.280000 -0.872000 -1.106000
1.840000 -1.443000 -0.264000
2.280000 0.872000 -1.106000
0.0 0.0 -2.277000
-2.066000 -0.460000 1.670000
-0.958000 -1.660000 1.024000
0.958000 1.660000 1.024000
2.066000 0.460000 1.670000
1.211000 -2.094000 0.353000
1.873000 -1.854000 -1.277000
2.853000 -1.460000 0.153000
2.447000 0.463000 -2.102000
1.888000 1.888000 -1.213000
3.239000 0.922000 -0.574000
-1.211000 2.094000 0.353000
-1.873000 1.854000 -1.277000
-2.853000 1.460000 0.153000
-2.447000 -0.463000 -2.102000
-1.888000 -1.888000 -1.213000
-3.239000 -0.922000 -0.574000
0.0 0.0 1.898000
0.0 0.0 3.107000
-0.389000 0.002000 -2.502000
0.389000 -0.002000 -2.502000
!entry.OTM.unit.residueconnect table  int c1x  int c2x  int c3x  int c4x  int c5x  int
c6x
0 0 0 0 0 0
!entry.OTM.unit.residues table  str name  int seq  int childseq  int startatomx  str
restype  int imagingx
"OTM" 1 31 1 "?" 0
!entry.OTM.unit.residuesPdbSequenceNumber array int
1
!entry.OTM.unit.solventcap array dbl
-1.000000
0.0
0.0
0.0
```

```
0.0
!entry.OTM.unit.velocities table  dbl x   dbl y   dbl z
0.0 0.0 0.0
0.0 0.0 0.0
0.0 0.0 0.0
0.0 0.0 0.0
0.0 0.0 0.0
0.0 0.0 0.0
0.0 0.0 0.0
0.0 0.0 0.0
0.0 0.0 0.0
0.0 0.0 0.0
0.0 0.0 0.0
0.0 0.0 0.0
0.0 0.0 0.0
0.0 0.0 0.0
0.0 0.0 0.0
0.0 0.0 0.0
0.0 0.0 0.0
0.0 0.0 0.0
0.0 0.0 0.0
0.0 0.0 0.0
0.0 0.0 0.0
0.0 0.0 0.0
0.0 0.0 0.0
0.0 0.0 0.0
0.0 0.0 0.0
0.0 0.0 0.0
0.0 0.0 0.0
0.0 0.0 0.0
0.0 0.0 0.0
0.0 0.0 0.0
0.0 0.0 0.0
0.0 0.0 0.0
!entry.PRX.unit.atoms table  str name  str type  int typex  int resx  int flags  int seq
int elmnt  dbl chg
"C1" "CT" 0 1 131072 1 6 0.287000
"N1" "NN" 0 1 131072 2 7 0.080000
"C2" "CT" 0 1 131072 3 6 0.287000
"C3" "CT" 0 1 131072 4 6 -0.055000
"C4" "CT" 0 1 131072 5 6 -0.055000
"O1" "ON" 0 1 131072 6 8 -0.184000
"C5" "CT" 0 1 131072 7 6 -0.106000
"C6" "CT" 0 1 131072 8 6 -0.106000
"C7" "CT" 0 1 131072 9 6 -0.106000
"C8" "CT" 0 1 131072 10 6 -0.106000
"H1" "HN" 0 1 131072 11 1 0.022000
"H2" "HN" 0 1 131072 12 1 0.022000
"H3" "HN" 0 1 131072 13 1 0.022000
"H4" "HN" 0 1 131072 14 1 0.022000
"H5" "HN" 0 1 131072 15 1 0.022000
"H6" "HN" 0 1 131072 16 1 0.022000
"H7" "HN" 0 1 131072 17 1 0.022000
"H8" "HN" 0 1 131072 18 1 0.022000
"H9" "HN" 0 1 131072 19 1 0.022000
"H10" "HN" 0 1 131072 20 1 0.022000
"H11" "HN" 0 1 131072 21 1 0.022000
"H12" "HN" 0 1 131072 22 1 0.022000
"H13" "HC" 0 1 131072 23 1 0.005000
"H14" "HC" 0 1 131072 24 1 0.005000
"H15" "HC" 0 1 131072 25 1 0.005000
"H16" "HC" 0 1 131072 26 1 0.005000
"Lp1" "LP" 0 1 131072 27 0 -0.110000
"Lp2" "LP" 0 1 131072 28 0 -0.110000
```



```
!entry.PRX.unit.atomsperinfo table str pname str ptype int ptypex int pelmnt dbl
pchg
"C1" "CT" 0 -1 0.0
"N1" "NN" 0 -1 0.0
"C2" "CT" 0 -1 0.0
"C3" "CT" 0 -1 0.0
"C4" "CT" 0 -1 0.0
"O1" "ON" 0 -1 0.0
"C5" "CT" 0 -1 0.0
"C6" "CT" 0 -1 0.0
"C7" "CT" 0 -1 0.0
"C8" "CT" 0 -1 0.0
"H1" "HN" 0 -1 0.0
"H2" "HN" 0 -1 0.0
"H3" "HN" 0 -1 0.0
"H4" "HN" 0 -1 0.0
"H5" "HN" 0 -1 0.0
"H6" "HN" 0 -1 0.0
"H7" "HN" 0 -1 0.0
"H8" "HN" 0 -1 0.0
"H9" "HN" 0 -1 0.0
"H10" "HN" 0 -1 0.0
"H11" "HN" 0 -1 0.0
"H12" "HN" 0 -1 0.0
"H13" "HC" 0 -1 0.0
"H14" "HC" 0 -1 0.0
"H15" "HC" 0 -1 0.0
"H16" "HC" 0 -1 0.0
"LP1" "LP" 0 -1 0.0
"LP2" "LP" 0 -1 0.0
!entry.PRX.unit.boundbox array dbl
-1.000000
0.0
0.0
0.0
0.0
!entry.PRX.unit.childsequence single int
2
!entry.PRX.unit.connect array int
0
0
!entry.PRX.unit.connectivity table int atom1x int atom2x int flags
1 2 1
1 5 1
1 10 1
1 9 1
2 6 1
2 3 1
3 4 1
3 8 1
3 7 1
4 24 1
4 23 1
4 5 1
5 26 1
5 25 1
6 28 1
6 27 1
7 12 1
7 13 1
7 11 1
8 15 1
8 16 1
```

```
8 14 1
9 18 1
9 17 1
9 19 1
10 22 1
10 20 1
10 21 1
!entry.PRX.unit.hierarchy table str abovetype int abovex str belowtype int belowx
"U" 0 "R" 1
"R" 1 "A" 1
"R" 1 "A" 2
"R" 1 "A" 3
"R" 1 "A" 4
"R" 1 "A" 5
"R" 1 "A" 6
"R" 1 "A" 7
"R" 1 "A" 8
"R" 1 "A" 9
"R" 1 "A" 10
"R" 1 "A" 11
"R" 1 "A" 12
"R" 1 "A" 13
"R" 1 "A" 14
"R" 1 "A" 15
"R" 1 "A" 16
"R" 1 "A" 17
"R" 1 "A" 18
"R" 1 "A" 19
"R" 1 "A" 20
"R" 1 "A" 21
"R" 1 "A" 22
"R" 1 "A" 23
"R" 1 "A" 24
"R" 1 "A" 25
"R" 1 "A" 26
"R" 1 "A" 27
"R" 1 "A" 28
!entry.PRX.unit.name single str
"PROXYL"
!entry.PRX.unit.positions table dbl x dbl y dbl z
1.250000 0.013000 0.126000
0.0 0.0 -0.666000
-1.250000 -0.013000 0.126000
-0.709000 -0.291000 1.534000
0.709000 0.291000 1.534000
0.0 0.0 -1.932000
-1.921000 1.360000 0.016000
-2.179000 -1.102000 -0.397000
2.179000 1.102000 -0.397000
1.921000 -1.360000 0.016000
-2.879000 1.359000 0.547000
-1.292000 2.148000 0.441000
-2.105000 1.598000 -1.036000
-3.095000 -1.135000 0.202000
-2.446000 -0.903000 -1.439000
-1.695000 -2.083000 -0.350000
3.095000 1.135000 0.202000
2.446000 0.903000 -1.439000
1.695000 2.083000 -0.350000
2.879000 -1.359000 0.547000
1.292000 -2.148000 0.441000
2.105000 -1.598000 -1.036000
-1.344000 0.148000 2.309000
```



```
"H3" "HC" 0 1 196608 14 1 0.024000
"H4" "HC" 0 1 196608 15 1 0.024000
"H5" "HC" 0 1 196608 16 1 0.024000
"H6" "HC" 0 1 196608 17 1 0.024000
"H7" "HN" 0 1 196608 18 1 0.027000
"H8" "HN" 0 1 196608 19 1 0.027000
"H9" "HN" 0 1 196608 20 1 0.027000
"H10" "HN" 0 1 196608 21 1 0.027000
"H11" "HN" 0 1 196608 22 1 0.027000
"H12" "HN" 0 1 196608 23 1 0.027000
"H13" "HN" 0 1 196608 24 1 0.027000
"H14" "HN" 0 1 196608 25 1 0.027000
"H15" "HN" 0 1 196608 26 1 0.027000
"H16" "HN" 0 1 196608 27 1 0.027000
"H17" "HN" 0 1 196608 28 1 0.027000
"H18" "HN" 0 1 196608 29 1 0.027000
"Lp1" "LP" 0 1 196608 30 0 -0.110000
"Lp2" "LP" 0 1 196608 31 0 -0.110000
!entry.TMP.unit.atomsperinfo table str pname str ptype int ptypex int pelmnt dbl
pchg
"N1" "NN" 0 -1 0.0
"C2" "CT" 0 -1 0.0
"C3" "CT" 0 -1 0.0
"C4" "CT" 0 -1 0.0
"C5" "CT" 0 -1 0.0
"C6" "CT" 0 -1 0.0
"C7" "CT" 0 -1 0.0
"C8" "CT" 0 -1 0.0
"C9" "CT" 0 -1 0.0
"C10" "CT" 0 -1 0.0
"O1" "ON" 0 -1 0.0
"H1" "HC" 0 -1 0.0
"H2" "HC" 0 -1 0.0
"H3" "HC" 0 -1 0.0
"H4" "HC" 0 -1 0.0
"H5" "HC" 0 -1 0.0
"H6" "HC" 0 -1 0.0
"H7" "HN" 0 -1 0.0
"H8" "HN" 0 -1 0.0
"H9" "HN" 0 -1 0.0
"H10" "HN" 0 -1 0.0
"H11" "HN" 0 -1 0.0
"H12" "HN" 0 -1 0.0
"H13" "HN" 0 -1 0.0
"H14" "HN" 0 -1 0.0
"H15" "HN" 0 -1 0.0
"H16" "HN" 0 -1 0.0
"H17" "HN" 0 -1 0.0
"H18" "HN" 0 -1 0.0
"Lp1" "LP" 0 -1 0.0
"Lp2" "LP" 0 -1 0.0
!entry.TMP.unit.boundbox array dbl
-1.000000
0.0
0.0
0.0
0.0
!entry.TMP.unit.childsequence single int
2
!entry.TMP.unit.connect array int
0
0
!entry.TMP.unit.connectivity table int atom1x int atom2x int flags
```

1 11 1  
1 2 1  
1 6 1  
2 3 1  
2 7 1  
2 8 1  
3 14 1  
3 15 1  
3 4 1  
4 12 1  
4 13 1  
4 5 1  
5 16 1  
5 17 1  
5 6 1  
6 10 1  
6 9 1  
7 25 1  
7 24 1  
7 26 1  
8 29 1  
8 27 1  
8 28 1  
9 19 1  
9 18 1  
9 20 1  
10 22 1  
10 23 1  
10 21 1  
11 31 1  
11 30 1

```
!entry.TMP.unit.hierarchy table str abovetype int abovex str belowtype int belowx  
"U" 0 "R" 1  
"R" 1 "A" 1  
"R" 1 "A" 2  
"R" 1 "A" 3  
"R" 1 "A" 4  
"R" 1 "A" 5  
"R" 1 "A" 6  
"R" 1 "A" 7  
"R" 1 "A" 8  
"R" 1 "A" 9  
"R" 1 "A" 10  
"R" 1 "A" 11  
"R" 1 "A" 12  
"R" 1 "A" 13  
"R" 1 "A" 14  
"R" 1 "A" 15  
"R" 1 "A" 16  
"R" 1 "A" 17  
"R" 1 "A" 18  
"R" 1 "A" 19  
"R" 1 "A" 20  
"R" 1 "A" 21  
"R" 1 "A" 22  
"R" 1 "A" 23  
"R" 1 "A" 24  
"R" 1 "A" 25  
"R" 1 "A" 26  
"R" 1 "A" 27  
"R" 1 "A" 28  
"R" 1 "A" 29  
"R" 1 "A" 30
```



0.0 0.0 0.0  
0.0 0.0 0.0  
0.0 0.0 0.0  
0.0 0.0 0.0  
0.0 0.0 0.0  
0.0 0.0 0.0  
0.0 0.0 0.0  
0.0 0.0 0.0  
0.0 0.0 0.0  
0.0 0.0 0.0  
0.0 0.0 0.0  
0.0 0.0 0.0  
0.0 0.0 0.0  
0.0 0.0 0.0  
0.0 0.0 0.0  
0.0 0.0 0.0  
0.0 0.0 0.0  
0.0 0.0 0.0  
0.0 0.0 0.0

!entry.TNN.unit.atoms table str name str type int typex int resx int flags int seq  
int elmnt dbl chg

"N1" "NN" 0 1 131074 1 7 0.037000  
"C2" "CT" 0 1 131074 2 6 0.160000  
"C3" "CT" 0 1 131074 3 6 -0.063000  
"C4" "CT" 0 1 131074 4 6 0.098000  
"C5" "CT" 0 1 131074 5 6 -0.063000  
"C6" "CT" 0 1 131074 6 6 0.160000  
"C7" "CT" 0 1 131074 7 6 -0.089000  
"C8" "CT" 0 1 131074 8 6 -0.089000  
"C9" "CT" 0 1 131074 9 6 -0.089000  
"C10" "CT" 0 1 131074 10 6 -0.089000  
"O11" "ON" 0 1 131074 11 8 -0.118000  
"H12" "HP" 0 1 131074 12 1 0.057000  
"H13" "HC" 0 1 131074 13 1 0.057000  
"H14" "HC" 0 1 131074 14 1 0.057000  
"H15" "HC" 0 1 131074 15 1 0.057000  
"H16" "HC" 0 1 131074 16 1 0.057000  
"H17" "HN" 0 1 131074 17 1 0.027000  
"H18" "HN" 0 1 131074 18 1 0.027000  
"H19" "HN" 0 1 131074 19 1 0.027000  
"H20" "HN" 0 1 131074 20 1 0.027000  
"H21" "HN" 0 1 131074 21 1 0.027000  
"H22" "HN" 0 1 131074 22 1 0.027000  
"H23" "HN" 0 1 131074 23 1 0.027000  
"H24" "HN" 0 1 131074 24 1 0.027000  
"H25" "HN" 0 1 131074 25 1 0.027000  
"H26" "HN" 0 1 131074 26 1 0.027000  
"H27" "HN" 0 1 131074 27 1 0.027000  
"H28" "HN" 0 1 131074 28 1 0.027000  
"N29" "NT" 0 1 131074 29 7 -1.010000  
"H30" "H" 0 1 131074 30 1 0.383000  
"H31" "H" 0 1 131074 31 1 0.383000  
"Lp1" "LP" 0 1 131074 32 0 -0.110000  
"Lp2" "LP" 0 1 131074 33 0 -0.110000

!entry.TNN.unit.atoms pertinfo table str pname str ptype int ptypex int pelmnt dbl  
pchg

"N1" "NN" 0 -1 0.0  
"C2" "CT" 0 -1 0.0  
"C3" "CT" 0 -1 0.0  
"C4" "CT" 0 -1 0.0  
"C5" "CT" 0 -1 0.0  
"C6" "CT" 0 -1 0.0  
"C7" "CT" 0 -1 0.0  
"C8" "CT" 0 -1 0.0

```
"C9" "CT" 0 -1 0.0
"C10" "CT" 0 -1 0.0
"O11" "ON" 0 -1 0.0
"H12" "HP" 0 -1 0.0
"H13" "HC" 0 -1 0.0
"H14" "HC" 0 -1 0.0
"H15" "HC" 0 -1 0.0
"H16" "HC" 0 -1 0.0
"H17" "HN" 0 -1 0.0
"H18" "HN" 0 -1 0.0
"H19" "HN" 0 -1 0.0
"H20" "HN" 0 -1 0.0
"H21" "HN" 0 -1 0.0
"H22" "HN" 0 -1 0.0
"H23" "HN" 0 -1 0.0
"H24" "HN" 0 -1 0.0
"H25" "HN" 0 -1 0.0
"H26" "HN" 0 -1 0.0
"H27" "HN" 0 -1 0.0
"H28" "HN" 0 -1 0.0
"N29" "NT" 0 -1 0.0
"H30" "H" 0 -1 0.0
"H31" "H" 0 -1 0.0
"Lp1" "LP" 0 -1 0.0
"Lp2" "LP" 0 -1 0.0
!entry.TNN.unit.boundbox array dbl
-1.000000
0.0
0.0
0.0
0.0
!entry.TNN.unit.childsequence single int
2
!entry.TNN.unit.connect array int
0
0
!entry.TNN.unit.connectivity table int atom1x int atom2x int flags
1 6 1
1 11 1
1 2 1
2 8 1
2 7 1
2 3 1
3 4 1
3 14 1
3 13 1
4 5 1
4 12 1
4 29 1
5 6 1
5 15 1
5 16 1
6 9 1
6 10 1
7 24 1
7 23 1
7 25 1
8 27 1
8 26 1
8 28 1
9 19 1
9 18 1
9 17 1
```



10 22 1  
10 20 1  
10 21 1  
11 33 1  
11 32 1  
29 30 1  
29 31 1

!entry.TNN.unit.hierarchy table str abovetype int abovex str belowtype int belowx

"U" 0 "R" 1  
"R" 1 "A" 1  
"R" 1 "A" 2  
"R" 1 "A" 3  
"R" 1 "A" 4  
"R" 1 "A" 5  
"R" 1 "A" 6  
"R" 1 "A" 7  
"R" 1 "A" 8  
"R" 1 "A" 9  
"R" 1 "A" 10  
"R" 1 "A" 11  
"R" 1 "A" 12  
"R" 1 "A" 13  
"R" 1 "A" 14  
"R" 1 "A" 15  
"R" 1 "A" 16  
"R" 1 "A" 17  
"R" 1 "A" 18  
"R" 1 "A" 19  
"R" 1 "A" 20  
"R" 1 "A" 21  
"R" 1 "A" 22  
"R" 1 "A" 23  
"R" 1 "A" 24  
"R" 1 "A" 25  
"R" 1 "A" 26  
"R" 1 "A" 27  
"R" 1 "A" 28  
"R" 1 "A" 29  
"R" 1 "A" 30  
"R" 1 "A" 31  
"R" 1 "A" 32  
"R" 1 "A" 33

!entry.TNN.unit.name single str

"TANINE"

!entry.TNN.unit.positions table dbl x dbl y dbl z

0.0 0.0 0.0  
0.0 0.0 1.490000  
1.437000 0.0 2.021000  
2.356000 0.992000 1.326000  
2.392000 0.636000 -0.152000  
1.024000 0.682000 -0.840000  
-0.794000 1.214000 1.993000  
-0.705000 -1.279000 1.942000  
1.101000 -0.077000 -2.165000  
0.571000 2.124000 -1.113000  
-1.120000 -0.214000 -0.555000  
1.944000 2.010000 1.443000  
1.397000 0.200000 3.100000  
1.878000 -0.998000 1.899000  
3.065000 1.311000 -0.697000  
2.816000 -0.373000 -0.237000  
1.354000 -1.128000 -1.994000  
0.145000 -0.034000 -2.691000



| !entry.TNO.unit.atoms | table | str name | str type | int typex | int resx | int flags | int seq   |
|-----------------------|-------|----------|----------|-----------|----------|-----------|-----------|
| int elmnt             | dbl   | chg      |          |           |          |           |           |
| "N1"                  | "NN"  | 0        | 1        | 131074    | 1        | 7         | 0.037000  |
| "C2"                  | "CT"  | 0        | 1        | 131074    | 2        | 6         | 0.160000  |
| "C3"                  | "CT"  | 0        | 1        | 131074    | 3        | 6         | -0.063000 |
| "C4"                  | "CT"  | 0        | 1        | 131074    | 4        | 6         | 0.098000  |
| "C5"                  | "CT"  | 0        | 1        | 131074    | 5        | 6         | -0.063000 |
| "C6"                  | "CT"  | 0        | 1        | 131074    | 6        | 6         | 0.160000  |
| "C7"                  | "CT"  | 0        | 1        | 131074    | 7        | 6         | -0.089000 |
| "C8"                  | "CT"  | 0        | 1        | 131074    | 8        | 6         | -0.089000 |
| "C9"                  | "CT"  | 0        | 1        | 131074    | 9        | 6         | -0.089000 |
| "C10"                 | "CT"  | 0        | 1        | 131074    | 10       | 6         | -0.089000 |
| "O11"                 | "ON"  | 0        | 1        | 131074    | 11       | 8         | -0.118000 |
| "H12"                 | "H1"  | 0        | 1        | 131074    | 12       | 1         | 0.057000  |
| "H13"                 | "HC"  | 0        | 1        | 131074    | 13       | 1         | 0.057000  |
| "H14"                 | "HC"  | 0        | 1        | 131074    | 14       | 1         | 0.057000  |
| "H15"                 | "HC"  | 0        | 1        | 131074    | 15       | 1         | 0.057000  |
| "H16"                 | "HC"  | 0        | 1        | 131074    | 16       | 1         | 0.057000  |
| "H17"                 | "HN"  | 0        | 1        | 131074    | 17       | 1         | 0.027000  |
| "H18"                 | "HN"  | 0        | 1        | 131074    | 18       | 1         | 0.027000  |
| "H19"                 | "HN"  | 0        | 1        | 131074    | 19       | 1         | 0.027000  |
| "H20"                 | "HN"  | 0        | 1        | 131074    | 20       | 1         | 0.027000  |
| "H21"                 | "HN"  | 0        | 1        | 131074    | 21       | 1         | 0.027000  |
| "H22"                 | "HN"  | 0        | 1        | 131074    | 22       | 1         | 0.027000  |
| "H23"                 | "HN"  | 0        | 1        | 131074    | 23       | 1         | 0.027000  |
| "H24"                 | "HN"  | 0        | 1        | 131074    | 24       | 1         | 0.027000  |
| "H25"                 | "HN"  | 0        | 1        | 131074    | 25       | 1         | 0.027000  |
| "H26"                 | "HN"  | 0        | 1        | 131074    | 26       | 1         | 0.027000  |
| "H27"                 | "HN"  | 0        | 1        | 131074    | 27       | 1         | 0.027000  |
| "H28"                 | "HN"  | 0        | 1        | 131074    | 28       | 1         | 0.027000  |
| "O29"                 | "OH"  | 0        | 1        | 131074    | 29       | 8         | -0.674000 |
| "H30"                 | "HO"  | 0        | 1        | 131074    | 30       | 1         | 0.430000  |
| "Lp1"                 | "LP"  | 0        | 1        | 131074    | 31       | 0         | -0.110000 |
| "Lp2"                 | "LP"  | 0        | 1        | 131074    | 32       | 0         | -0.110000 |

| !entry.TNO.unit.atoms | pertinfo | table | str pname | str ptype | int ptypex | int pelmnt | dbl |
|-----------------------|----------|-------|-----------|-----------|------------|------------|-----|
|                       |          |       |           |           |            |            | chg |
| "N1"                  | "NN"     | 0     | -1        | 0.0       |            |            |     |
| "C2"                  | "CT"     | 0     | -1        | 0.0       |            |            |     |
| "C3"                  | "CT"     | 0     | -1        | 0.0       |            |            |     |
| "C4"                  | "CT"     | 0     | -1        | 0.0       |            |            |     |
| "C5"                  | "CT"     | 0     | -1        | 0.0       |            |            |     |
| "C6"                  | "CT"     | 0     | -1        | 0.0       |            |            |     |
| "C7"                  | "CT"     | 0     | -1        | 0.0       |            |            |     |
| "C8"                  | "CT"     | 0     | -1        | 0.0       |            |            |     |
| "C9"                  | "CT"     | 0     | -1        | 0.0       |            |            |     |
| "C10"                 | "CT"     | 0     | -1        | 0.0       |            |            |     |
| "O11"                 | "ON"     | 0     | -1        | 0.0       |            |            |     |
| "H12"                 | "H1"     | 0     | -1        | 0.0       |            |            |     |
| "H13"                 | "HC"     | 0     | -1        | 0.0       |            |            |     |
| "H14"                 | "HC"     | 0     | -1        | 0.0       |            |            |     |
| "H15"                 | "HC"     | 0     | -1        | 0.0       |            |            |     |
| "H16"                 | "HC"     | 0     | -1        | 0.0       |            |            |     |
| "H17"                 | "HN"     | 0     | -1        | 0.0       |            |            |     |
| "H18"                 | "HN"     | 0     | -1        | 0.0       |            |            |     |
| "H19"                 | "HN"     | 0     | -1        | 0.0       |            |            |     |
| "H20"                 | "HN"     | 0     | -1        | 0.0       |            |            |     |
| "H21"                 | "HN"     | 0     | -1        | 0.0       |            |            |     |
| "H22"                 | "HN"     | 0     | -1        | 0.0       |            |            |     |
| "H23"                 | "HN"     | 0     | -1        | 0.0       |            |            |     |
| "H24"                 | "HN"     | 0     | -1        | 0.0       |            |            |     |
| "H25"                 | "HN"     | 0     | -1        | 0.0       |            |            |     |
| "H26"                 | "HN"     | 0     | -1        | 0.0       |            |            |     |
| "H27"                 | "HN"     | 0     | -1        | 0.0       |            |            |     |

```
"H28" "HN" 0 -1 0.0
"O29" "OH" 0 -1 0.0
"H30" "HO" 0 -1 0.0
"Lp1" "LP" 0 -1 0.0
"Lp2" "LP" 0 -1 0.0
!entry.TNO.unit.boundbox array dbl
-1.000000
0.0
0.0
0.0
0.0
!entry.TNO.unit.childsequence single int
2
!entry.TNO.unit.connect array int
0
0
!entry.TNO.unit.connectivity table int atom1x int atom2x int flags
1 6 1
1 11 1
1 2 1
2 8 1
2 7 1
2 3 1
3 4 1
3 14 1
3 13 1
4 5 1
4 12 1
4 29 1
5 6 1
5 15 1
5 16 1
6 9 1
6 10 1
7 24 1
7 23 1
7 25 1
8 27 1
8 26 1
8 28 1
9 19 1
9 18 1
9 17 1
10 22 1
10 20 1
10 21 1
11 31 1
11 32 1
29 30 1
!entry.TNO.unit.hierarchy table str abovetype int abovex str belowtype int belowx
"U" 0 "R" 1
"R" 1 "A" 1
"R" 1 "A" 2
"R" 1 "A" 3
"R" 1 "A" 4
"R" 1 "A" 5
"R" 1 "A" 6
"R" 1 "A" 7
"R" 1 "A" 8
"R" 1 "A" 9
"R" 1 "A" 10
"R" 1 "A" 11
"R" 1 "A" 12
```

```
"R" 1 "A" 13
"R" 1 "A" 14
"R" 1 "A" 15
"R" 1 "A" 16
"R" 1 "A" 17
"R" 1 "A" 18
"R" 1 "A" 19
"R" 1 "A" 20
"R" 1 "A" 21
"R" 1 "A" 22
"R" 1 "A" 23
"R" 1 "A" 24
"R" 1 "A" 25
"R" 1 "A" 26
"R" 1 "A" 27
"R" 1 "A" 28
"R" 1 "A" 29
"R" 1 "A" 30
"R" 1 "A" 31
"R" 1 "A" 32
!entry.TNO.unit.name single str
"ANOL"
!entry.TNO.unit.positions table dbl x dbl y dbl z
0.0 0.0 0.0
0.0 0.0 1.490000
1.437000 0.0 2.023000
2.358000 0.983000 1.324000
2.389000 0.652000 -0.157000
1.017000 0.696000 -0.838000
-0.790000 1.217000 1.995000
-0.707000 -1.277000 1.943000
1.090000 -0.048000 -2.172000
0.559000 2.139000 -1.093000
-1.119000 -0.220000 -0.555000
1.999000 2.012000 1.474000
1.410000 0.208000 3.100000
1.875000 -1.000000 1.903000
3.063000 1.338000 -0.684000
2.818000 -0.354000 -0.257000
1.344000 -1.101000 -2.013000
0.133000 0.001000 -2.695000
1.865000 0.407000 -2.799000
-0.465000 2.136000 -1.479000
0.584000 2.754000 -0.188000
1.211000 2.609000 -1.837000
-0.280000 2.163000 1.790000
-1.771000 1.242000 1.512000
-0.936000 1.140000 3.078000
-1.746000 -1.284000 1.607000
-0.206000 -2.161000 1.536000
-0.685000 -1.337000 3.037000
3.671000 0.855000 1.859000
3.945000 1.695000 2.230000
-1.189000 -0.089000 -0.980000
-1.446000 -0.428000 -0.326000
!entry.TNO.unit.residueconnect table int c1x int c2x int c3x int c4x int c5x int
c6x
0 0 0 0 0 0
!entry.TNO.unit.residues table str name int seq int childseq int startatomx str
restype int imagingx
"ANOL" 1 34 1 "?" 0
!entry.TNO.unit.residuesPdbSequenceNumber array int
1
```
